# Supplementary material for: Middle Miocene climate of southwestern Anatolia from multiple botanical proxies
Source: Copernicus journal article supplement (doi:10.5194/cp-14-1427-2018), 2018-10-17

**S7: Modern climate stations comparable to the middle Miocene climate of the Yatağan Basin**

| Country                   | City                | Month         | X3wet    | X3wet (mm) | Month   | X3dry      | X3dry (mm) | X3wet/X3dry | MAP (mm)           | MAT (°C)                      | Comment |                                      |
|---------------------------|---------------------|---------------|----------|------------|---------|------------|------------|-------------|--------------------|-------------------------------|---------|--------------------------------------|
| Yatagan Basin Miocene min |                     |               |          |            |         |            |            | 2,80        | 1000               | 11,2 (Eskh. 11,2; Tinaz 12,3) |         |                                      |
| Yatagan Basin Miocene max |                     |               |          |            |         |            |            | 3,80        | 2000               | 15,2 (Eskh. 14; Tinaz 15,2)   |         |                                      |
|                           |                     |               |          |            |         |            |            |             |                    |                               |         |                                      |
| Spain                     | Pamplona            | Nov–Jan       |          | 348        | Jun–Aug |            | 177        | 1,97        | Cfb                | 1042                          | 12,30   | too low X3wet/X3dry ratio            |
| Switzerland               | Lugano              | May–Jul       |          | 540        | Dec–Feb |            | 209,4      | 2,58        | Cfb                | 1364                          | 11,40   | lower X3wet/X3dry ratio              |
|                           | Lugano L            | Apr–Jun       |          | 434        | Dec–Feb |            | 209,4      | 2,07        | Cfb                | 1687,3                        | 11,90   | lower X3wet/X3dry ratio              |
| Crimea                    | Yalta (Jalta)       | Nov–Jan (Feb) |          | 196        | Mar–May |            | 112        | 1,75        | Cfa                | 565                           | 12,00   | too dry, too low X3wet/X3dry ratio   |
| Russia                    | Sotchi              | Nov–Jan       |          | 543        | May–Jul |            | 277        | 1,96        | Cfa                | 1514                          | 14,50   | too low X3wet/X3dry ratio            |
|                           | Sotchi L            | Dec–Feb       |          | 465        | May–Jul |            | 230        | 2,02        |                    | 1413                          | 13,80   | lower X3wet/X3dry ratio              |
|                           | Tuapse              | Nov–Jan       |          | 422        | Apr–Jun |            | 233        | 1,81        | Cfa                | 1249                          | 13,60   | too low X3wet/X3dry ratio            |
|                           | Tuapse L            | Nov–Jan       |          | 461        | Apr–Jun |            | 237        | 1,95        |                    | 1371                          | 13,50   | too low X3wet/X3dry ratio            |
| W Turkey                  | Izmir               | Dec–Feb       |          | 374        | Jun–Aug |            | 15         | 24,93       | Csa                | 687                           | 16,70   | too dry, very high X3wet/X3dry ratio |
| SW Turkey                 | Muğla               | Dec–Feb       |          | 654        | Jun–Aug |            | 34         | 19,24       | Csa                | 1109                          | 15,30   | very high X3wet/X3dry ratio          |
| N Turkey                  | Bahçeköy            | Nov–Jan       |          | 383        | May–Jul |            | 101        | 3,79        | borderline Cfa/Csa | 888                           | 13,40   | too dry                              |
|                           | Kilyos              | Nov–Jan       |          | 350        | May–Jul |            | 96         | 3,65        | borderline Cfa/Csa | 824                           | 13,90   | too dry                              |
|                           | Zonguldak           | Nov–Jan       |          | 413        | Apr–Jun |            | 174        | 2,37        | Cfb                | 1113                          | 13,90   | lower X3wet/X3dry ratio              |
|                           | Kastamonu           | Oct–Dec (Jan) |          | 390        | May–Jul |            | 135        | 2,89        | Cfa                | 1015                          | 13,80   | match                                |
|                           | Bozkurt             | Oct–Dec       |          | 396        | May–Jul |            | 145        | 2,73        | Cfa                | 1023                          | 13,70   | lower X3wet/X3dry ratio              |
|                           | Rize                | Oct–Dec       |          | 657        | Apr–Jun |            | 289        | 2,27        | Cfa                | 1860                          | 14,30   | lower X3wet/X3dry ratio              |
|                           | Hopa                | Oct–Dec       |          | 748        | Mar–May |            | 312        | 2,40        | Cfa                | 2087                          | 14,40   | too wet, lower X3wet/X3dry ratio     |
|                           |                     |               |          |            |         |            |            |             |                    |                               |         |                                      |
| Georgia                   | Poti                | Aug–Oct       |          | 651        | Mar–May |            | 270        | 2,41        | Cfa                | 1907                          | 14,40   | lower X3wet/X3dry ratio              |
|                           | Kobuleti            | Oct–Dec       |          | 791        | Mar–May |            | 331        | 2,39        | Cfa                | 2276                          | 14,20   | wetter, lower X3wet/X3dry ratio      |
|                           | Samtredia           | Oct–Nov       |          | 513        | Mar–May |            | 258        | 1,99        | Cfa                | 1521                          | 14,90   | lower X3wet/X3dry ratio              |
|                           | Samtredia L         | Oct–Nov       |          | 482        | Mar–May |            | 236,6      | 2,04        | Cfa                | 1432,4                        | 14,40   | lower X3wet/X3dry ratio              |
|                           |                     |               |          |            |         |            |            |             |                    |                               |         |                                      |
| N Iran                    | Rasht               | Sep–Nov       |          | 576        | May–Jul |            | 126        | 4,57        | Cfa                | 1359                          | 15,80   | higher X3wet/X3dry ratio             |
|                           | Kiashahr            | Oct–Dec       |          | 582        | May–Jul |            | 123        | 4,73        | borderline Cfa/Csa | 1295                          | 15,60   | higher X3wet/X3dry ratio             |
| Pakistan                  | Parachinar          | Feb–Apr       |          | 296        | Oct–Dec |            | 79         | 3,75        | Cfa                | 785                           | 15,00   | too dry                              |
|                           | Murree              | Jul–Sep       | 700(819) |            | Oct–Dec | 122(156,6) |            | 5,738(5,23) | Cwb                | 1440                          | 12,70   | too high X3wet/X3dry ratio           |
| China                     | Fouzhou (Jiangxi)   | Apr–Jun       |          | 720        | Oct–Dec |            | 155        | 4,65        | Cfa                | 1491                          | 18,40   | too hot, higher X3wet/X3dry ratio    |
|                           | Shaoxing (Zhejiang) | May–Jul       |          | 497        | Nov–Jan |            | 156        | 3,19        | Cfa                | 1321                          | 16,90   | too hot                              |
|                           | Nanjing (Jiangsu)   | Jun–Aug       |          | 443        | Dec–Feb |            | 116        | 3,82        | Cfa                | 1001                          | 15,60   |                                      |
|                           | Dongtai (Jiangsu)   | Jun–Aug       |          | 499        | Dec–Feb |            | 98         | 5,09        | Cfa                | 985                           | 14,60   | too high X3wet/X3dry ratio           |
|                           | Dongtai (Jiangsu) L | Jun–Aug       |          | 500        | Dec–Feb |            | 99         | 5,05        | Cfa                | 1003                          | 14,70   | too high X3wet/X3dry ratio           |

|             |                      |         |          |               |             |              |     |        |       |                                                                                         |
|-------------|----------------------|---------|----------|---------------|-------------|--------------|-----|--------|-------|-----------------------------------------------------------------------------------------|
|             | Guiyang (Guizhou)    | May–Jul | 574      | Dec–Feb       | 66          | 8,70         | Cwa | 1170   | 16,20 | too hot, too high X3wet/X3dry ratio,<br>wettest month prec 215/ driest month prec 20 mm |
| South Korea | Mokp'o (Mokposi)     | Jun–Aug | 544      | Dec–Feb       | 111(116,5)  | 4,8(4,532)   | Cfa | 1141   | 14,20 | too high X3wet/X3dry ratio                                                              |
|             | Pusan (Busan)        | Jun–Aug | 663(623) | Dec–Feb       | 107,9 (112) | 6,145(5,563) | Cfa | 1380   | 14,10 | too high X3wet/X3dry ratio                                                              |
| Japan       | Hiroshima (Honshu)   | May–Jul | 658      | Dec–Feb       | 200         | 3,29         | Cfa | 1640   | 14,40 | match                                                                                   |
|             | Hiroshima (Honshu) L | May–Jul | 636      | Dec–Feb       | 161,6       | 3,94         | Cfa | 1548,2 | 14,60 |                                                                                         |
|             | Kameyama (Honshu)    | Jun–Aug | 628      | Dec–Feb       | 180         | 3,49         | Cfa | 1707   | 14,90 | match                                                                                   |
|             | Kanzaki (Kyushu)     | Jun–Aug | 801      | Nov–Jan (Feb) | 199         | 4,03         | Cfa | 1819   | 16,30 | too warm                                                                                |
|             | Kyoto (Honshu)       | Jun–Aug | 664      | Dec–Feb       | 225         | 2,95         | Cfa | 1730   | 15,40 | too warm                                                                                |
|             | Kyoto (Honshu) L     | Jun–Aug | 583      | Dec–Feb       | 179,9       | 3,24         | Cfa | 1569,5 | 14,30 | match                                                                                   |
|             | Nagoya (Honshu)      | Jun–Aug | 610      | Dec–Feb       | 188         | 3,24         | Cfa | 1644   | 15,70 | too warm                                                                                |
|             | Nagoya (Honshu) L    | Jul–Sep | 578      | Dec–Feb       | 167,6       | 3,45         | Cfa | 1596,5 | 14,50 | match                                                                                   |
|             | Onahama, (Honshu)    | Aug–Oct | 475,2    | Dec–Feb       | 147,4       | 3,22         | Cfa | 1369   | 13,30 | match                                                                                   |
|             | Onahama, (Honshu) L  | Aug–Oct | 518      | Dec–Feb       | 122,9       | 4,21         | Cfa | 1379   | 13,10 | higher X3wet/X3dry ratio                                                                |
|             | Sendai, (Honshu)     | Jul–Sep | 507      | Dec–Feb       | 188         | 2,70         | Cfa | 1286   | 11,90 | lower X3wet/X3dry ratio                                                                 |
|             | Sendai, (Honshu) L   | Jul–Sep | 507      | Dec–Feb       | 129,8       | 3,90         | Cfa | 1230   | 11,90 | higher X3wet/X3dry ratio                                                                |
|             | Takasaki (Honshu)    | Jul–Sep | 564      | Dec–Feb       | 104         | 5,42         | Cfa | 1247   | 14,20 | too high X3wet/X3dry ratio                                                              |
|             | Tokyo, (Honshu)      | Aug–Oct | 507      | Dec–Feb       | 159         | 3,19         | Cfa | 1435   | 15,60 | too warm                                                                                |
|             | Tokyo, (Honshu) L    | Aug–Oct | 565      | Dec–Feb       | 176         | 3,21         | Cfa | 1531,5 | 14,60 | match                                                                                   |
|             | Yoshino (Honshu)     | Jun–Aug | 787      | Dec–Feb       | 216         | 3,64         | Cfa | 2124   | 14,20 | wetter, slight winter frosts possible                                                   |
| USA         | Portland             | Jun–Aug | 462      | Nov–Jan       | 84          | 5,50         | Csb | 1001   | 11,90 | too high X3wet/X3dry ratio                                                              |

E USA: Cf climates too wet, too equable (low X3wet/X3dry) in the east,  
too winter cold in the interior

L (Lieth, 1999)

S7 (1) Modern climate stations comparable to the middle Miocene climate of the Yatağan Basin, southwestern Anatolia. Climate data from CLIMATE-DATA.ORG (<https://de.climate-data.org/info/sources/>) and Ustaoğlu (2012).  
Selected Walter-Lieth climate diagrams

SW Turkey: Muğla

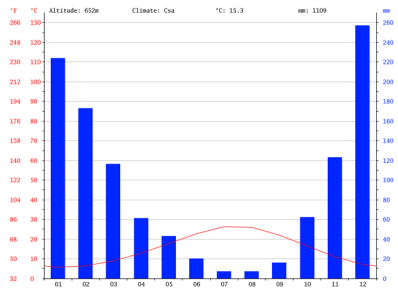

N Turkey: Bahçeköy

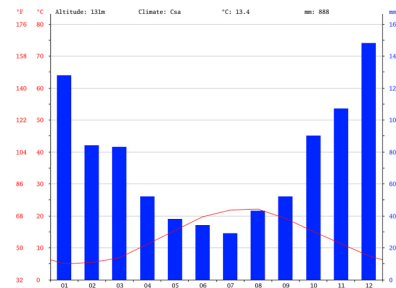

N Turkey: Bozurt

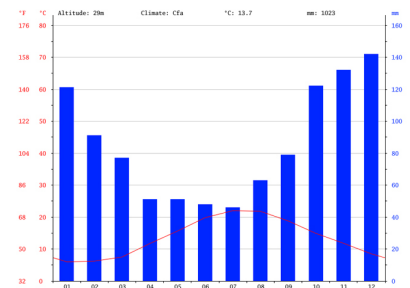

N Turkey: Hopa

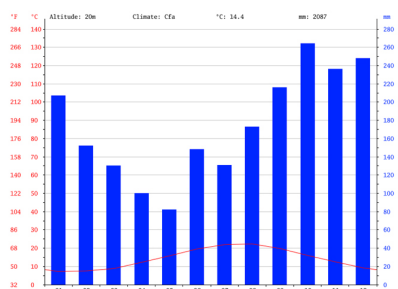

N Turkey: Kastamou

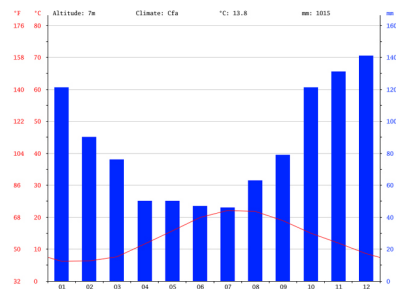

N Turkey: Kilyos

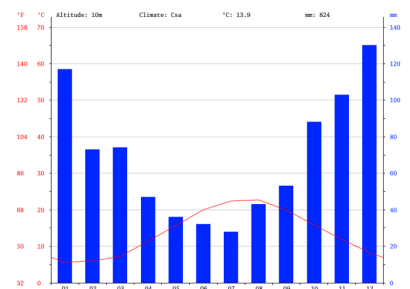

N Turkey: Rize

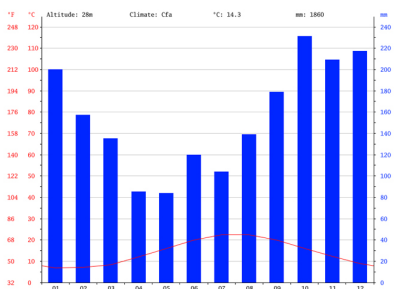

N Turkey: Zonguldak

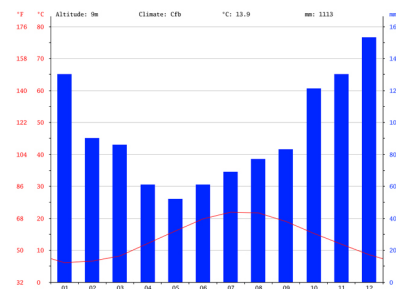

Crimea: Yalta

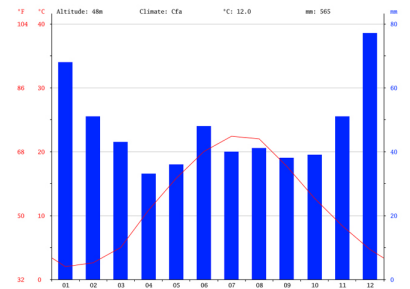

Georgia: Kobuleti

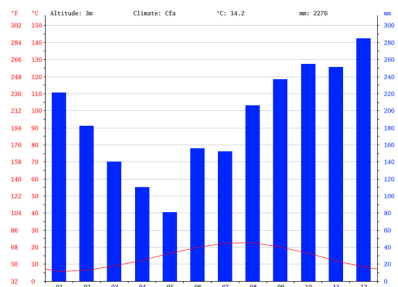

Georgia: Poti

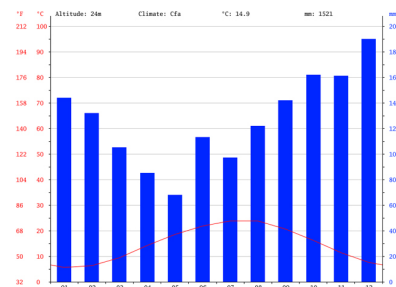

Georgia: Samtredia

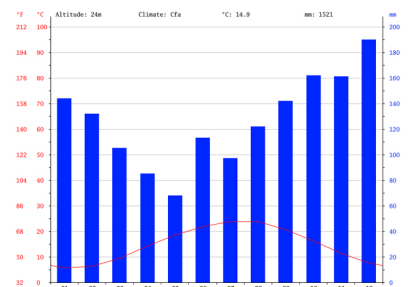

Pakistan: Murree

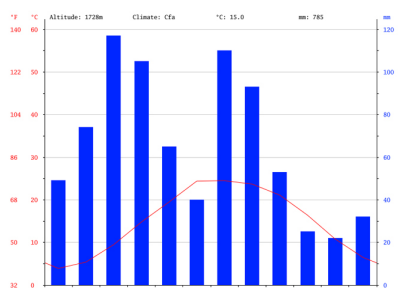

Pakistan: Parachinar

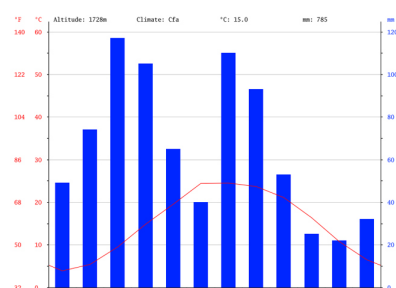

N Iran: Rasht

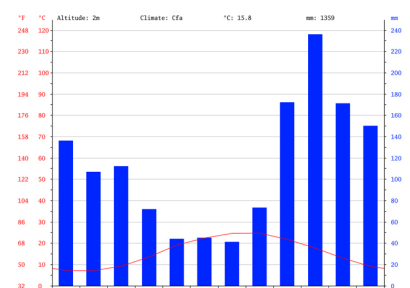

S7 (2) Modern climate stations comparable to the middle Miocene climate of the Yatağan Basin, southwestern Anatolia. Climate data from CLIMATE-DATA.ORG (<https://de.climate-data.org/info/sources/>) and Ustaoğlu (2012).  
Selected Walter-Lieth climate diagrams

N Iran: Kiashahar

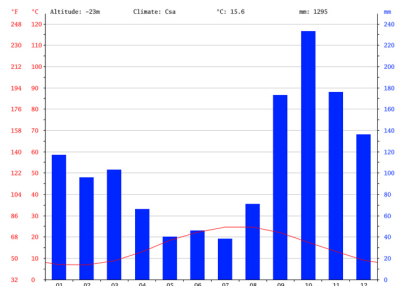

Spain: Pamplona

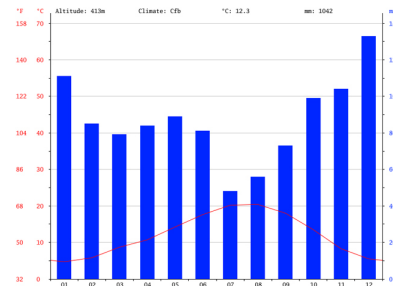

Switzerland: Lugano

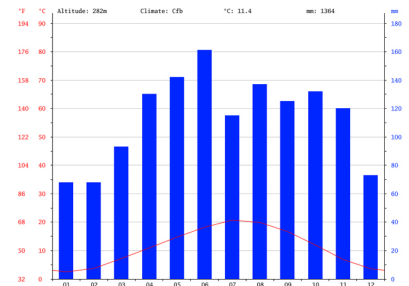

Russia: Sotchi

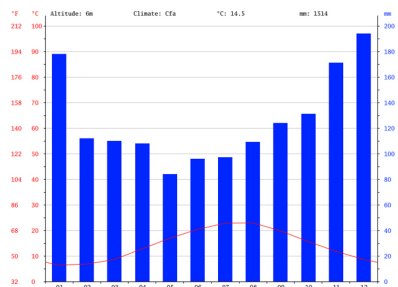

Russia: Tuapse

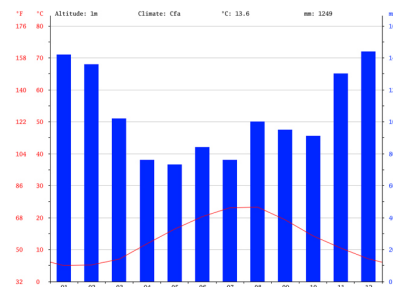

USA: Portland

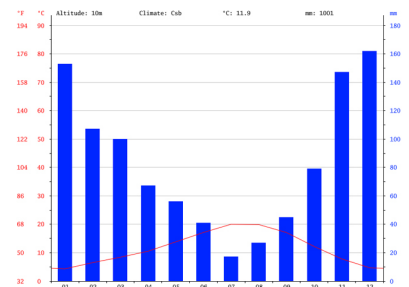

China: Fuzhou (Jiangxi)

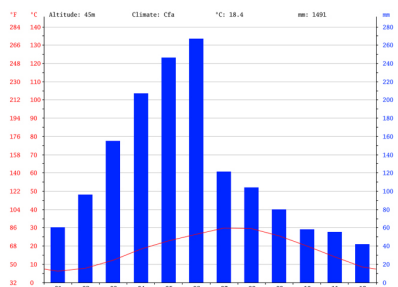

China: Shaoxing (Zhejiang)

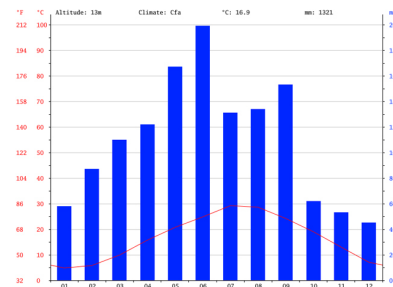

China: Nanjing (Jiangsu)

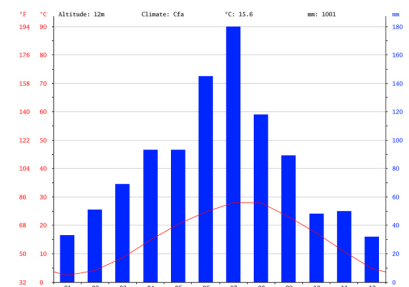

China: Dongtai (Jiangsu)

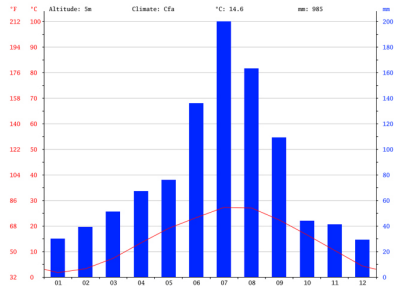

China: Guiyang (Guizhou)

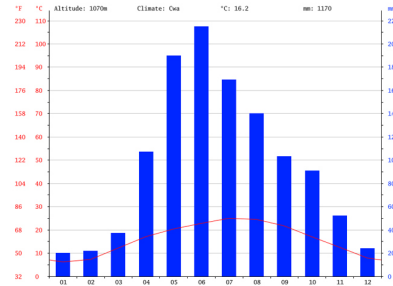

South Korea: Mok'po

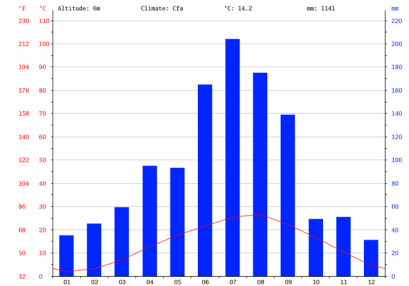

South Korea: Pusan

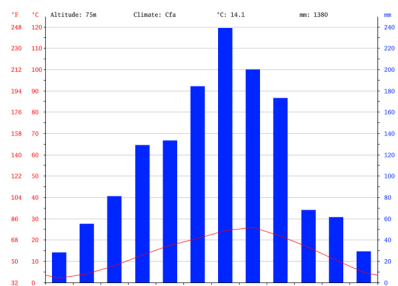

Japan: Hiroshima (Honshu)

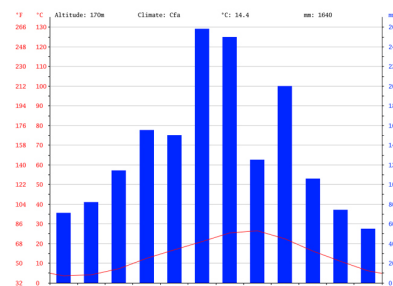

Japan: Kameyama (Honshu)

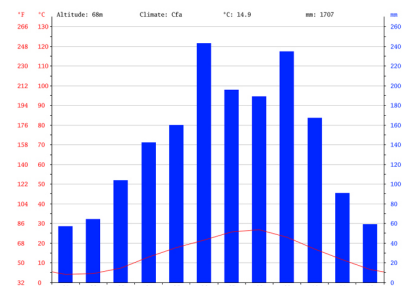

S7 (3) Modern climate stations comparable to the middle Miocene climate of the Yatağan Basin, southwestern Anatolia. Climate data from CLIMATE-DATA.ORG (<https://de.climate-data.org/info/sources/>) and Ustaoğlu (2012).  
Selected Walter-Lieth climate diagrams

Japan: Kanzaki (Honshu)

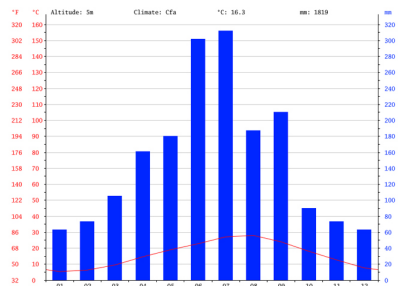

Japan: Kyoto (Honshu)

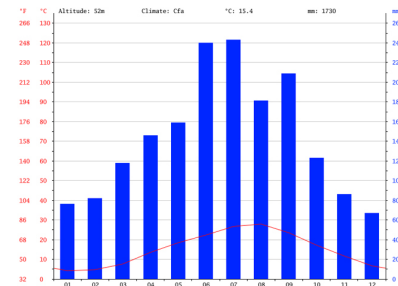

Japan: Nagoya (Honshu)

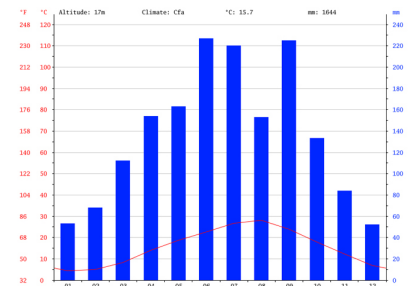

Japan: Onahama (Honshu)

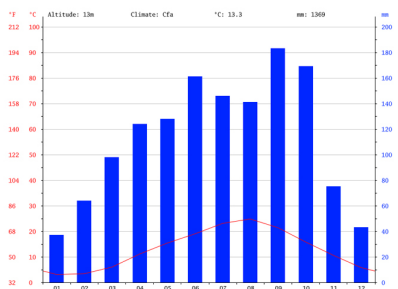

Japan: Sendai (Honshu)

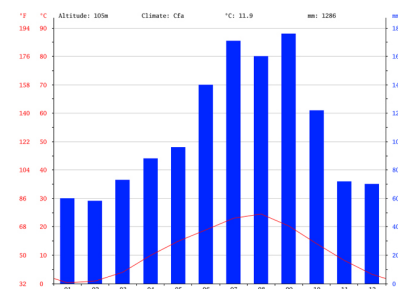

Japan: Tokyo (Honshu)

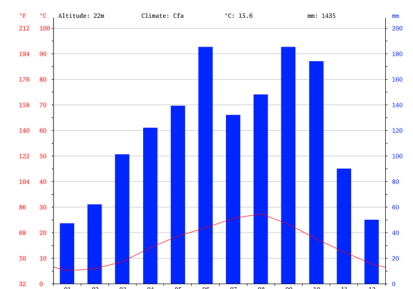

Japan: Yoshino (Honshu)

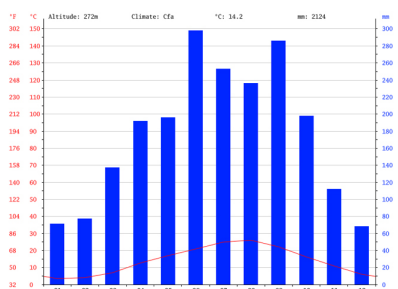

Supplement: Supplementary file 5 [file Bouchal et al S_7.pdf › SI1-7/Bouchal et al S_7.pdf]
