# Supplementary material for: Middle Miocene climate of southwestern Anatolia from multiple botanical proxies
Source: Copernicus journal article supplement (doi:10.5194/cp-14-1427-2018), 2018-10-17
Supplement: Supplementary file 1 [file Bouchal et al S_3 CLAMP.pdf › SI1-7/Bouchal et al S_3 CLAMP.pdf]

**Supplementary Material S3:** Climate parameters reconstructed by CLAMP (<http://clamp.ibcas.ac.cn/>; Yang et al., 2011) for three localities in the Yatağan Basin

Abbreviations:

MAT – mean annual temperature (°C)

WMMT – warm month mean temperature (°C)

CMMT – cold month mean temperature (°C)

GROWSEAS – length of growing season (months)

GSP – growing season precipitation (cm)

MMGSP – mean month growing season precipitation (cm)

X3.WET – precipitation of the three wettest months (cm)

X3.DRY – precipitation of the three driest months (cm)

RH – relative humidity (%)

SH – specific humidity (g/kg)

ENTHALPY – (kJ/kg)\*10<sup>-1</sup>

For excel files of scoring of leaf characters for the localities Tınaz, Eskihisar, and Salihpaşalar, please contact the corresponding authors.

Tinaz

MAT (°C)

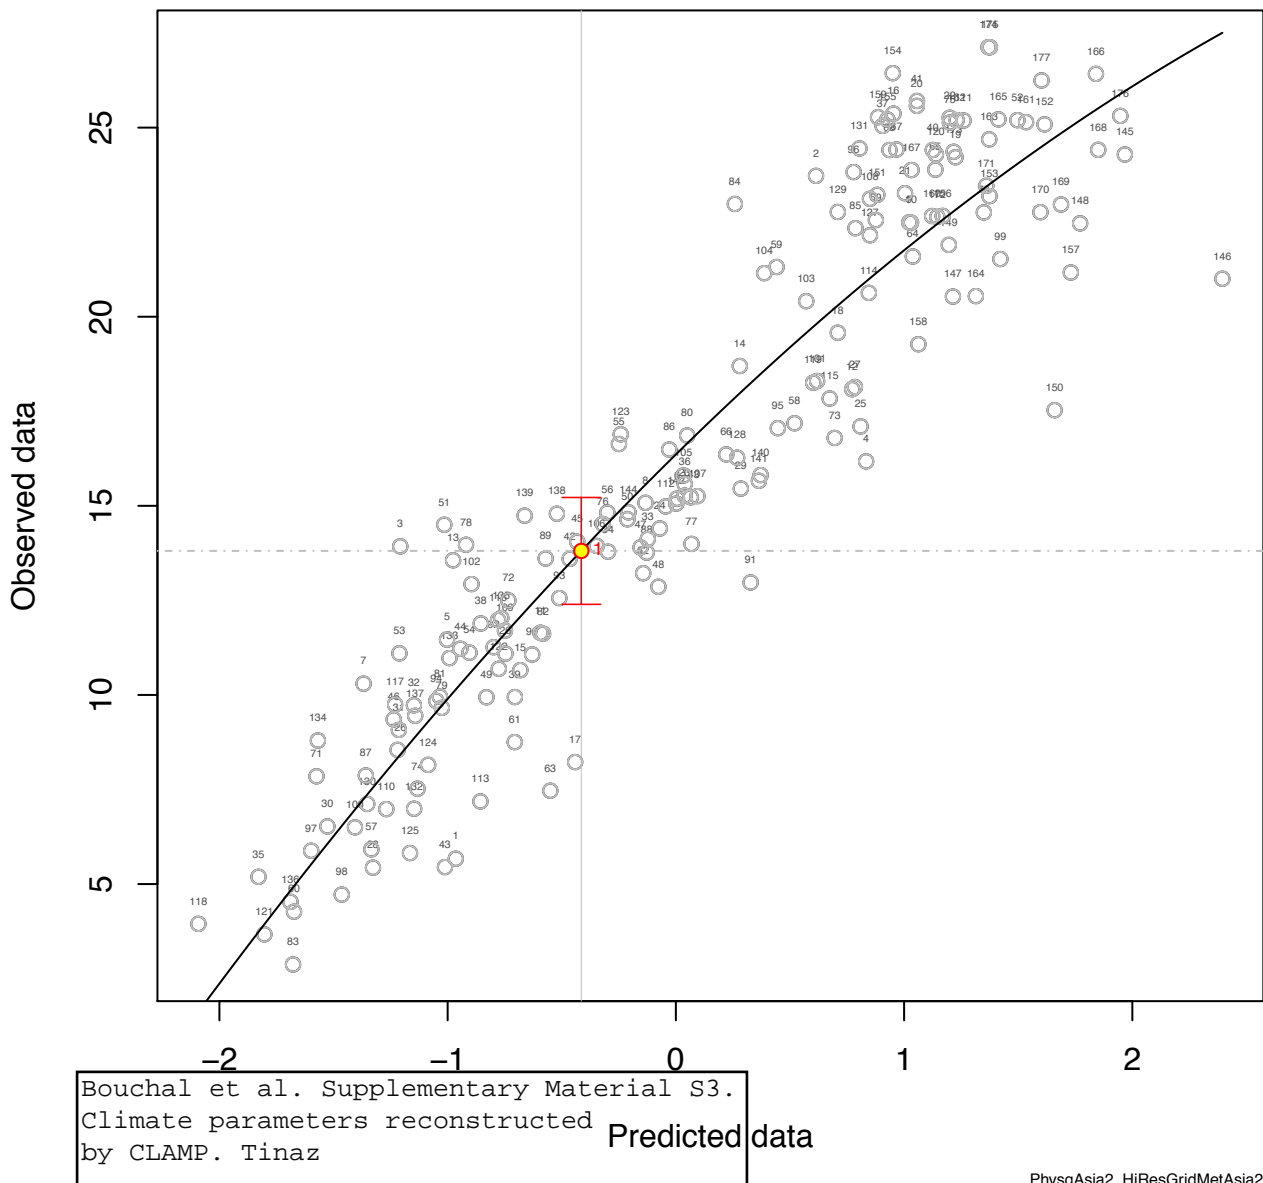

WMMT (°C)

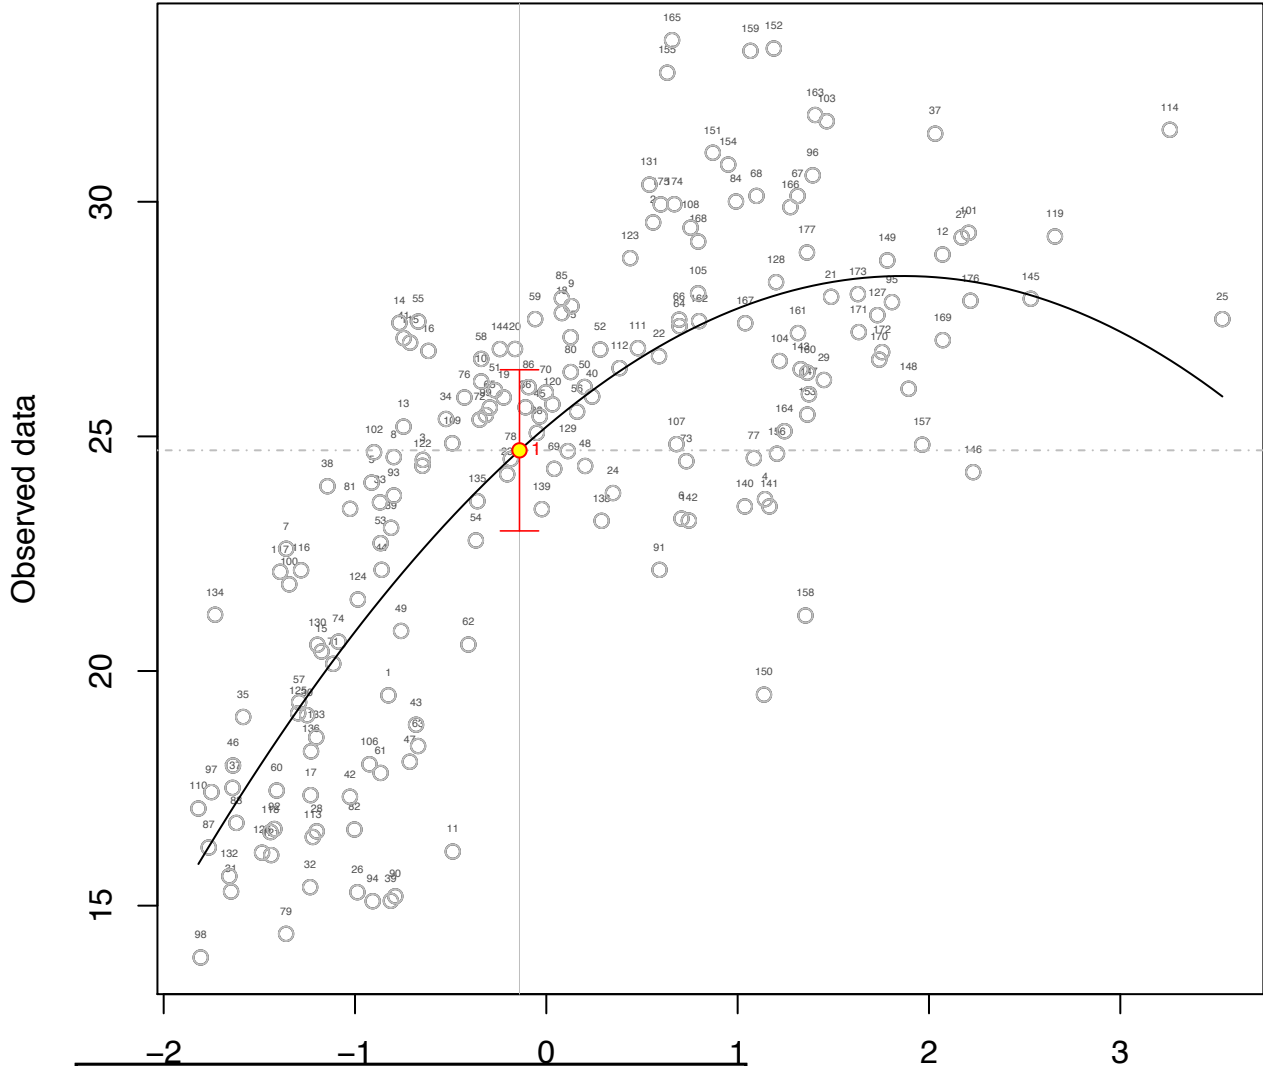

Bouchal et al. Supplementary Material S3.  
Climate parameters reconstructed  
by CLAMP. Tinaz

Predicted data

CMMT (°C)

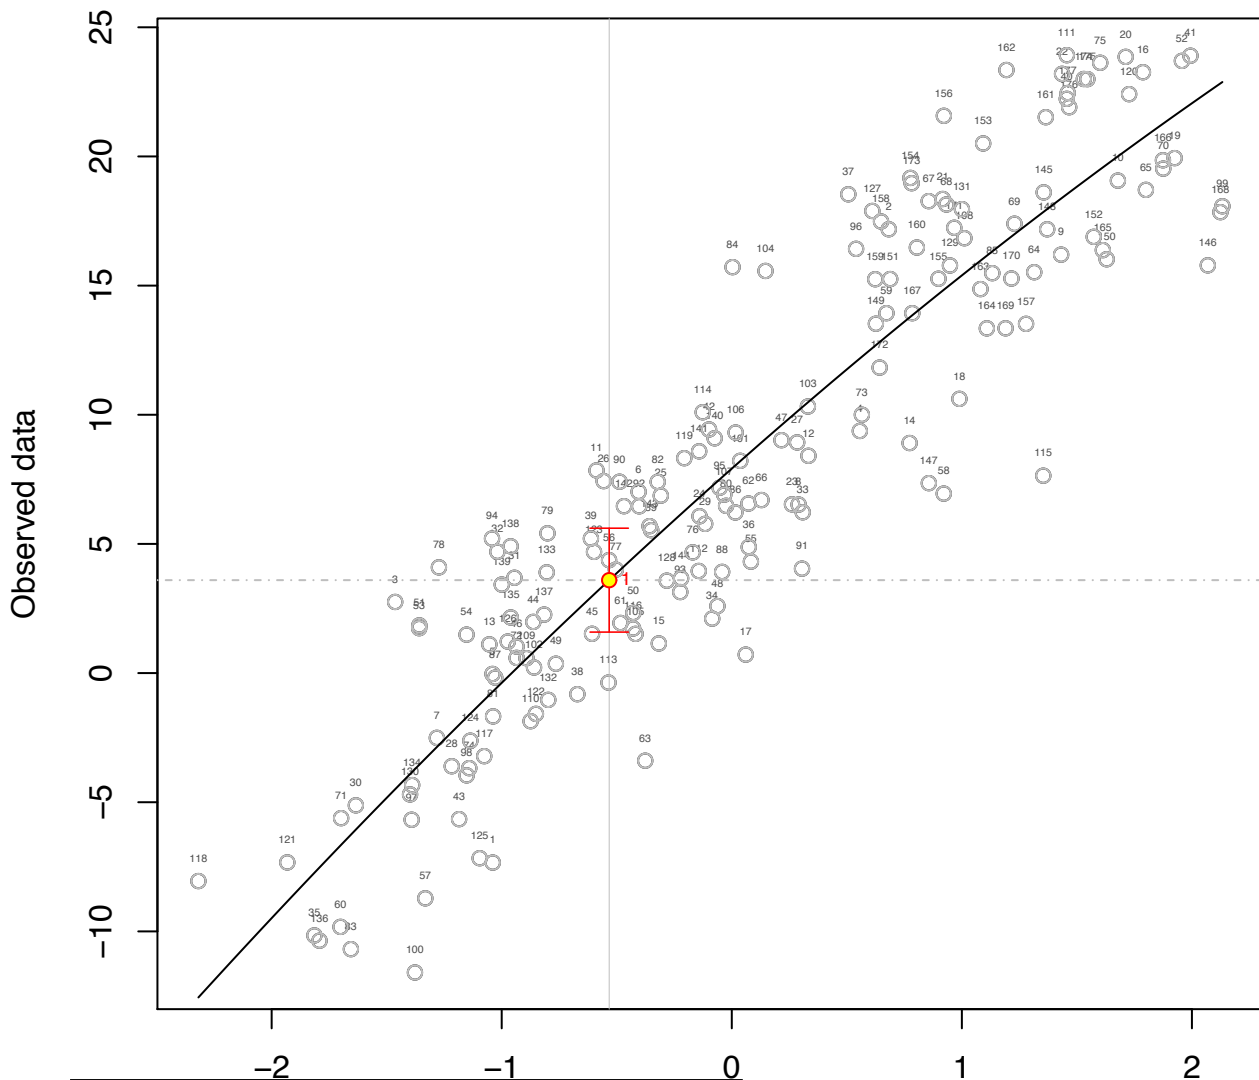

Bouchal et al. Supplementary Material S3.  
Climate parameters reconstructed  
by CLAMP. Tinaz

Predicted data

GROWSEAS (months)

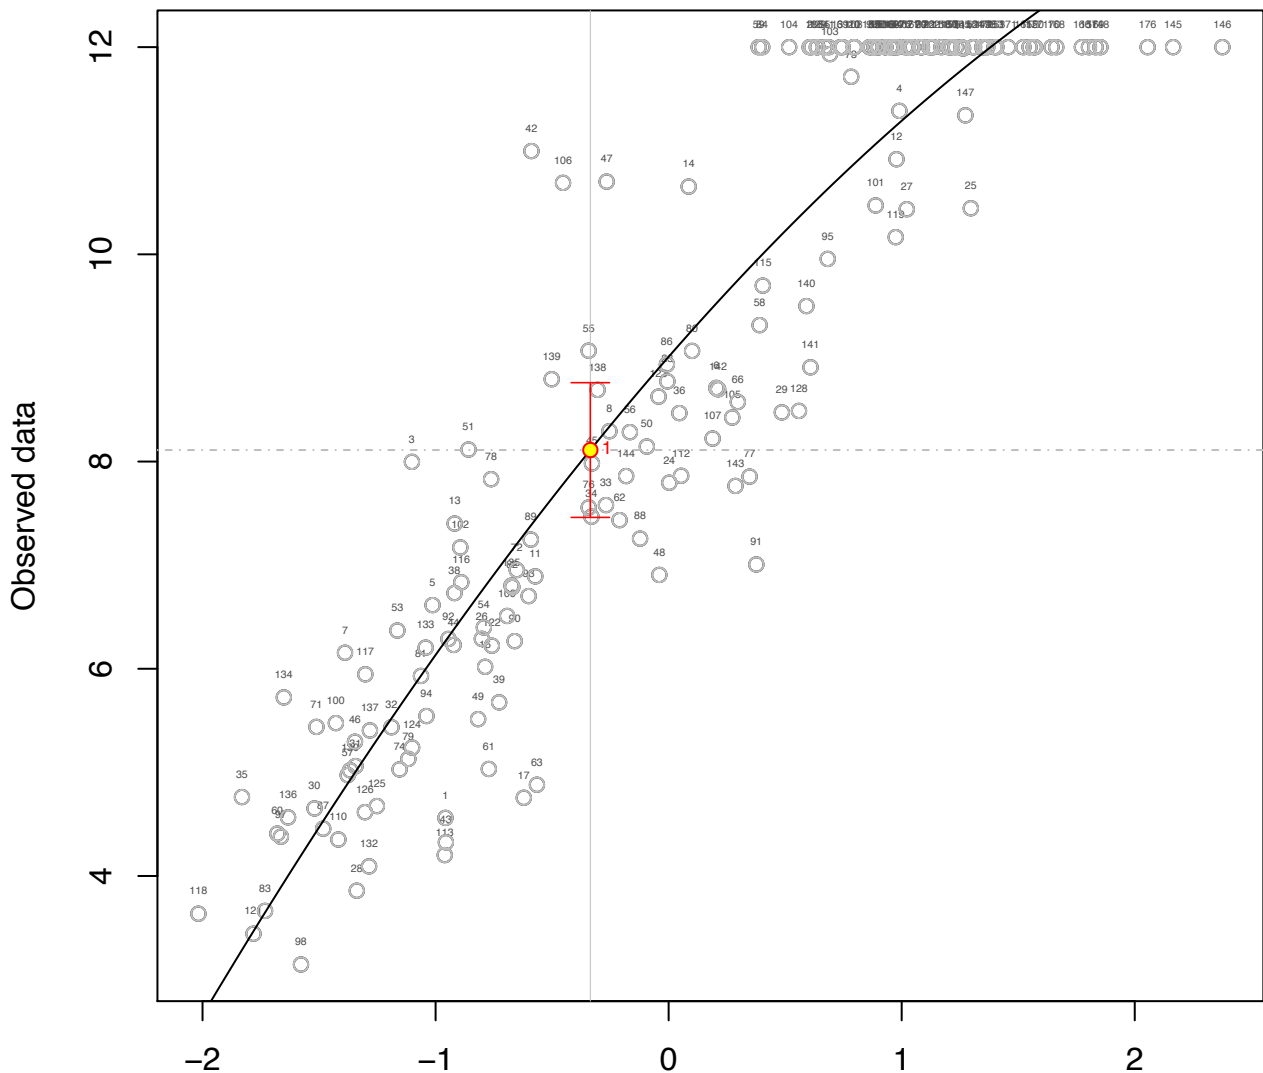

Bouchal et al. Supplementary Material S3.  
Climate parameters reconstructed  
by GROWSEAS  
by GROWSEAS

Predicted data

**GSP (cm)**

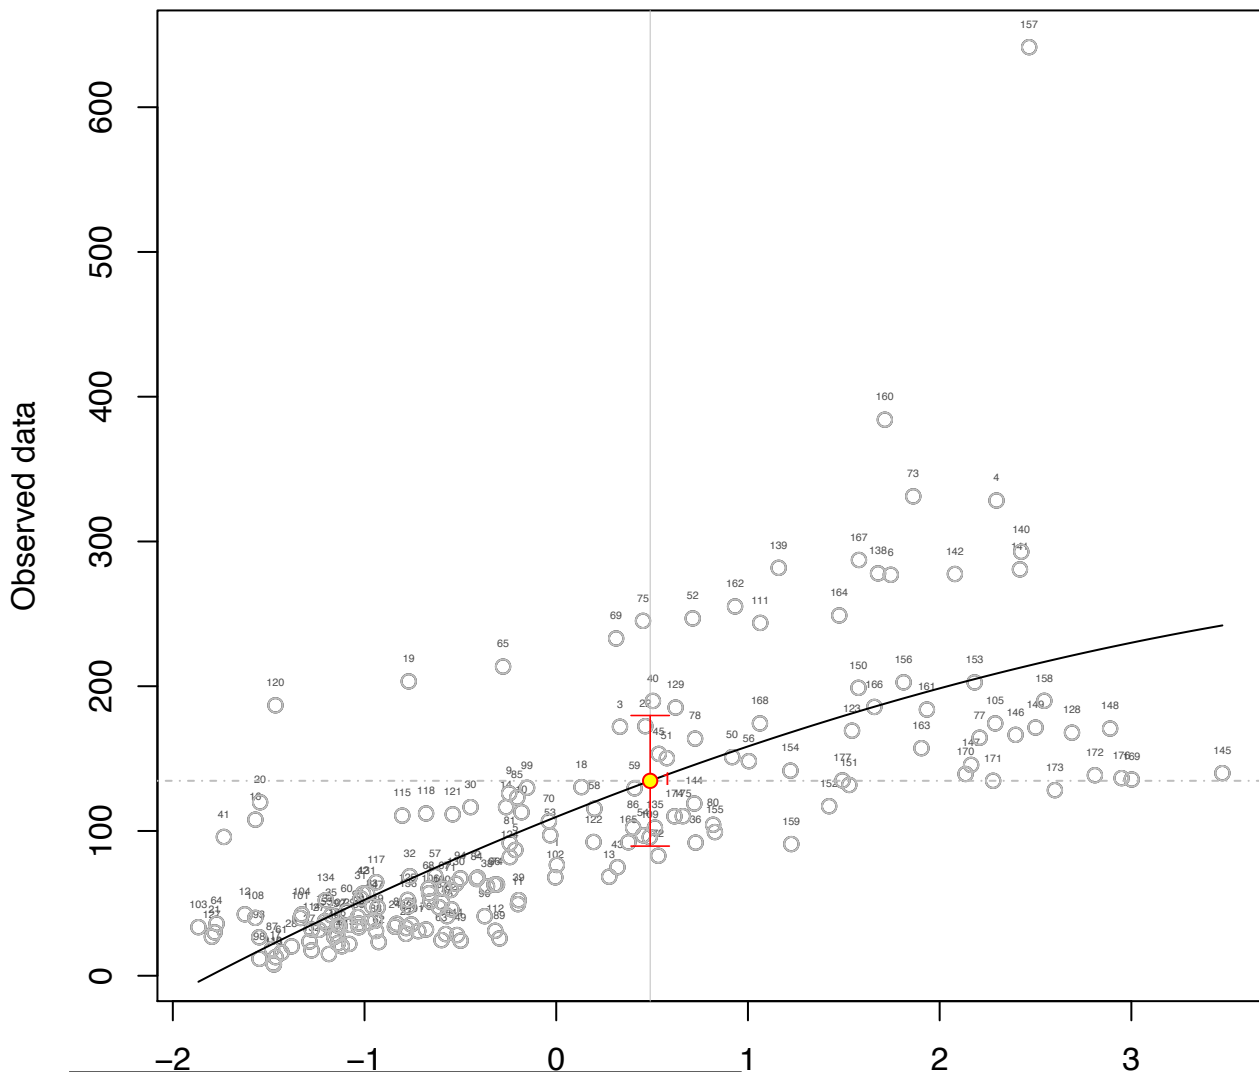

Bouchal et al. Supplementary Material S3.

Climate parameters reconstructed

Cytochrome P450 parameters reconstructed

6- - AT AMT 11: - -

## Predicted data

MMGSP (cm)

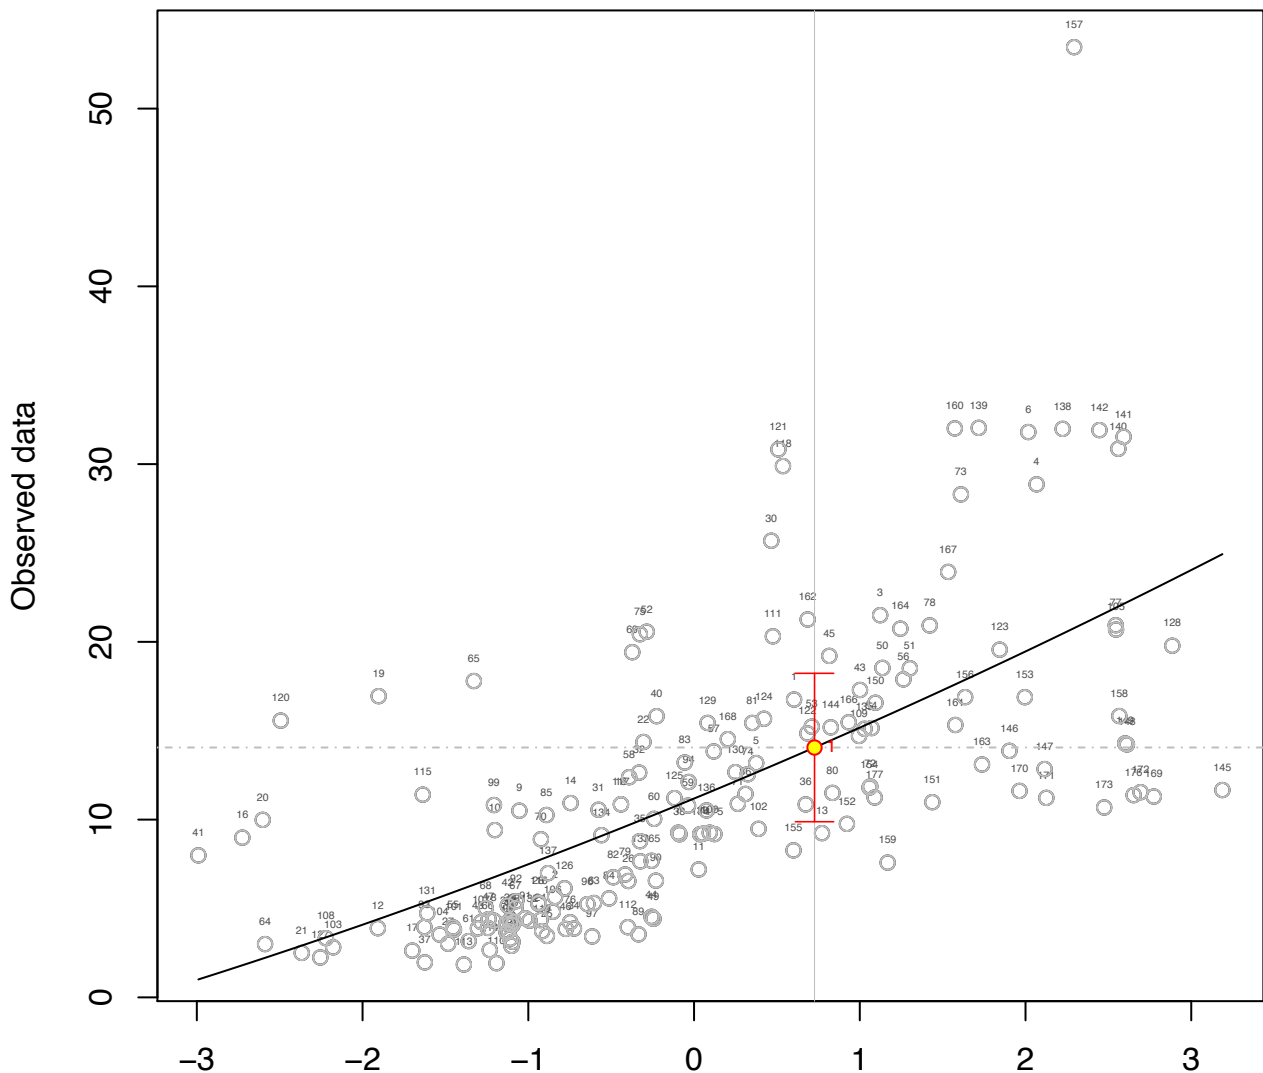

Bouchal et al. Supplementary Material S3.  
Climate parameters reconstructed  
by CLAMP. Tinaz

Predicted data

X3.WET (cm)

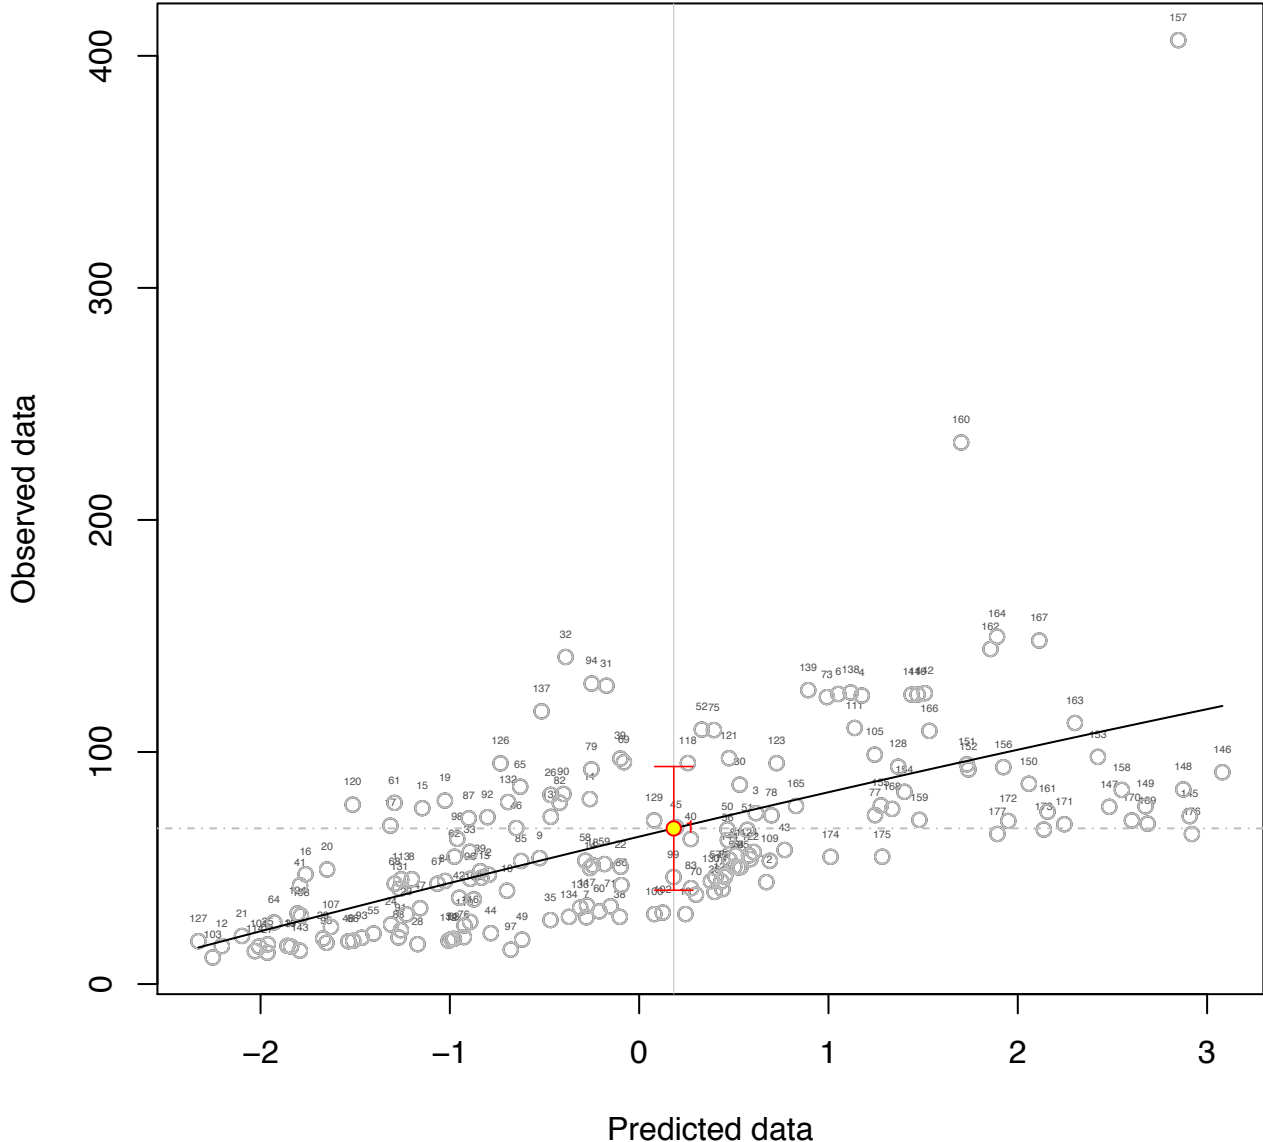



X3.DRY (cm)

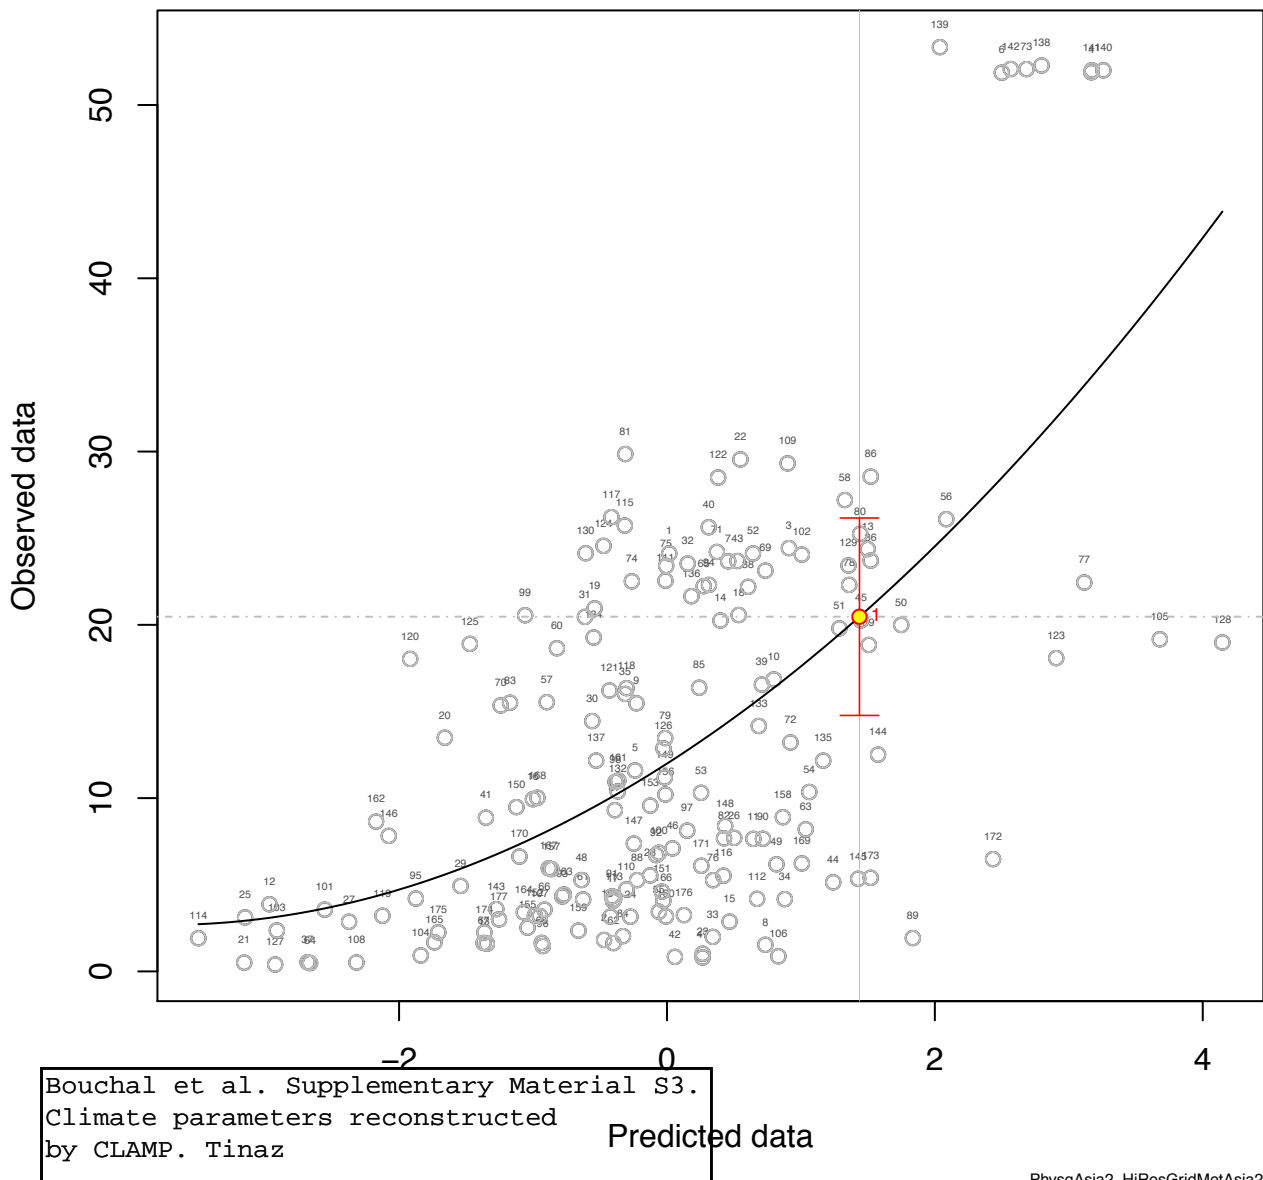

RH (%)

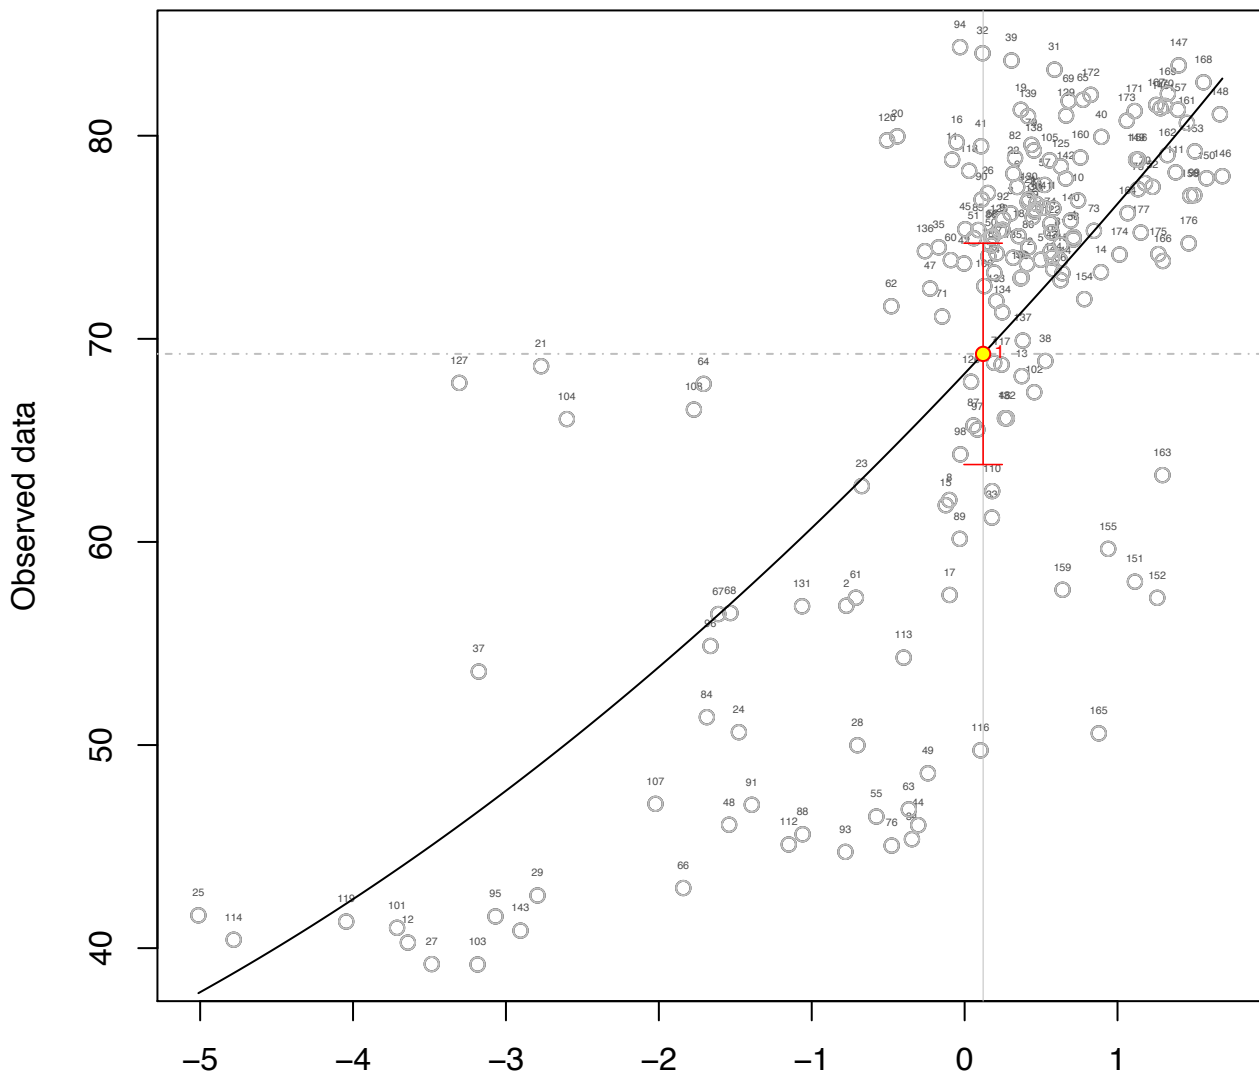

Bouchal et al. Supplementary Material S3.  
Climate parameters reconstructed by CLAMP. Tinaz

SH (g/Kg)

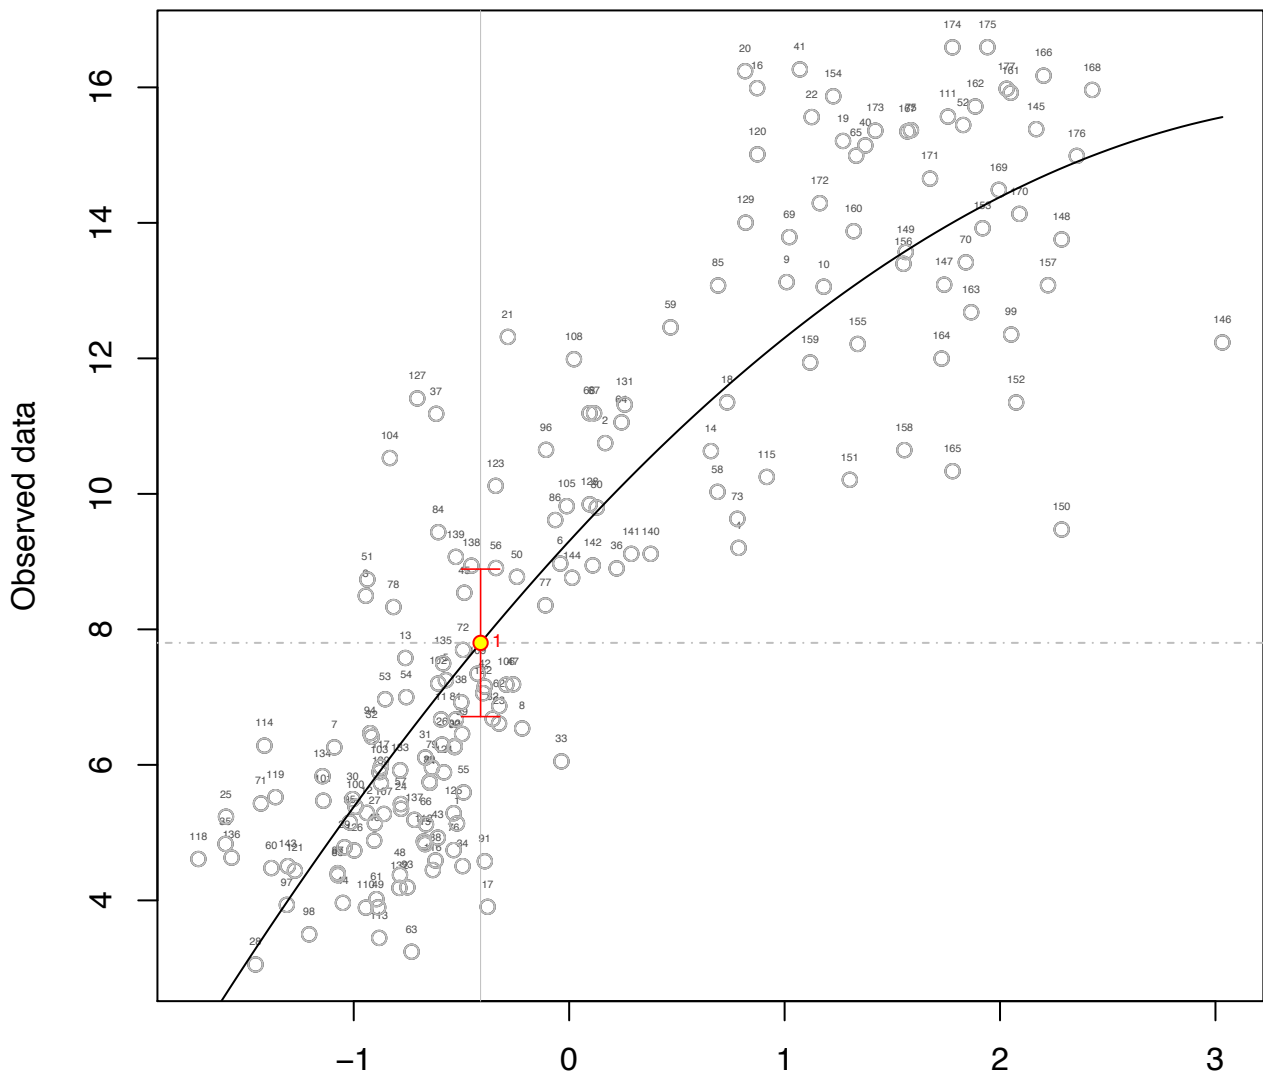

Bouchal et al. Supplementary Material S3.  
Climate parameters reconstructed  
by CLAMP. Tinaz

Predicted data

ENTHAL (kJ/Kg)

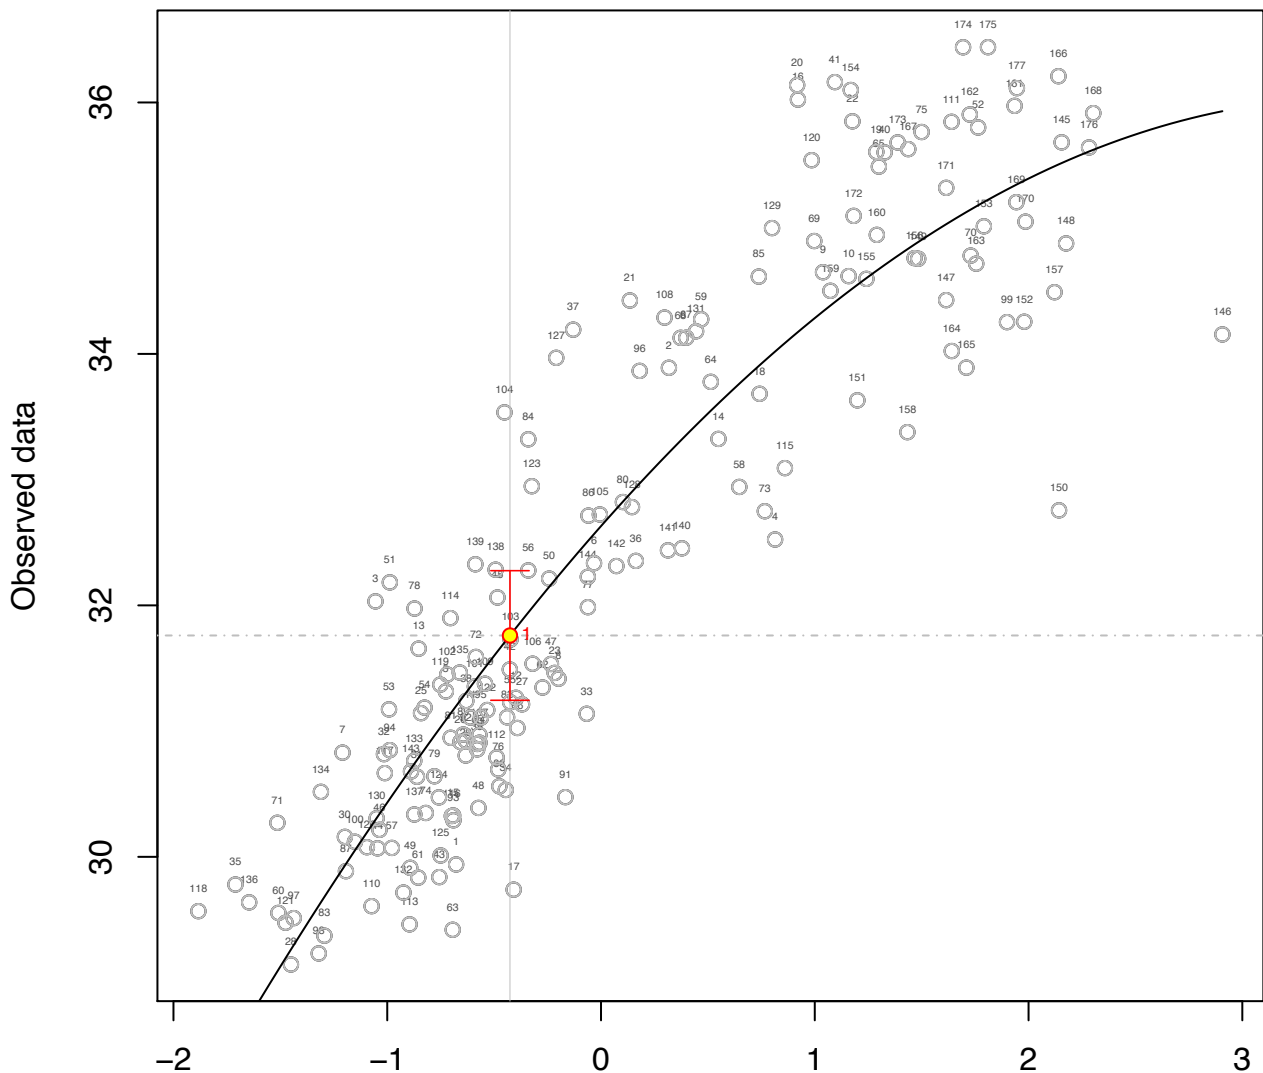

Bouchal et al. Supplementary Material S3.  
Climate parameters reconstructed by CLAMP. Tinaz

Eskihisar

MAT (°C)

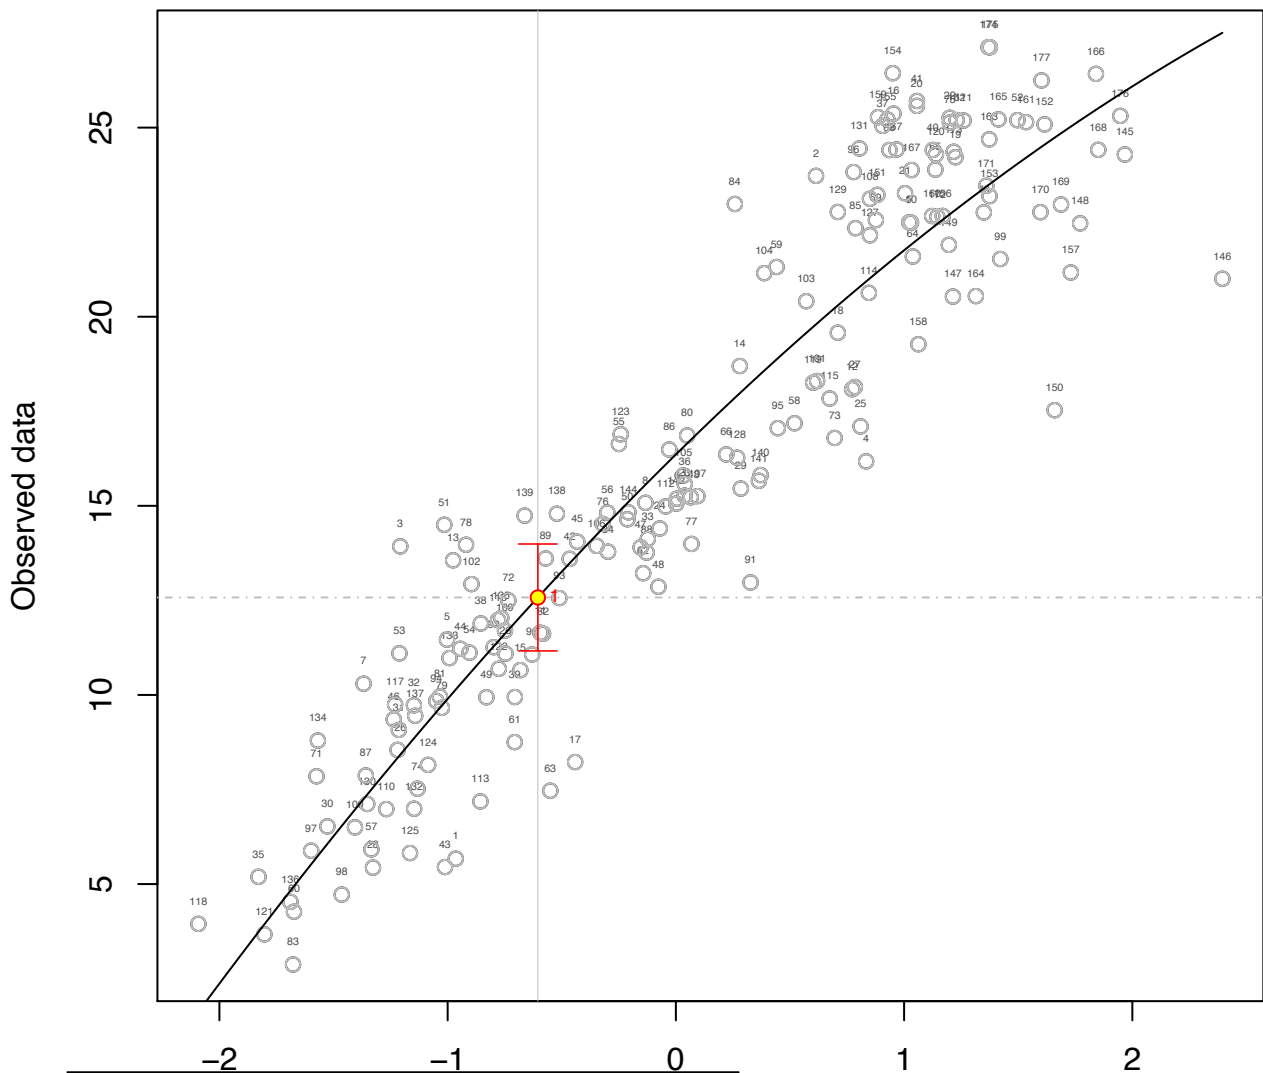

Bouchal et al. Supplementary Material S3.  
Climate parameters reconstructed  
by CLAMP. Eskihisar

Predicted data

WMMT (°C)

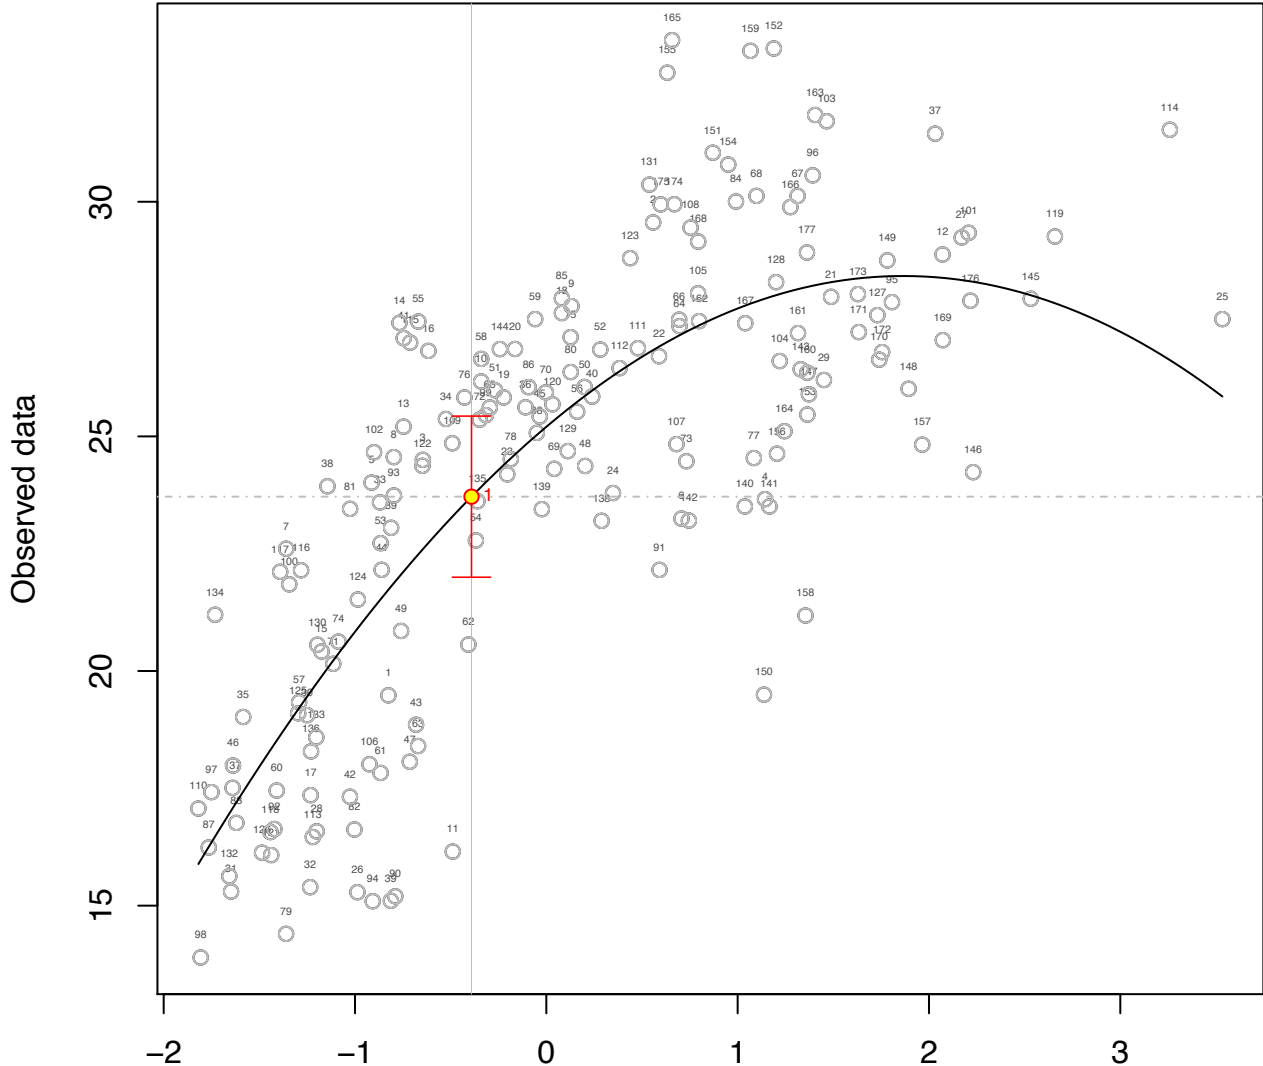

Bouchal et al. Supplementary Material S3.  
Climate parameters reconstructed by CLAMP. Eskihisar

CMMT (°C)

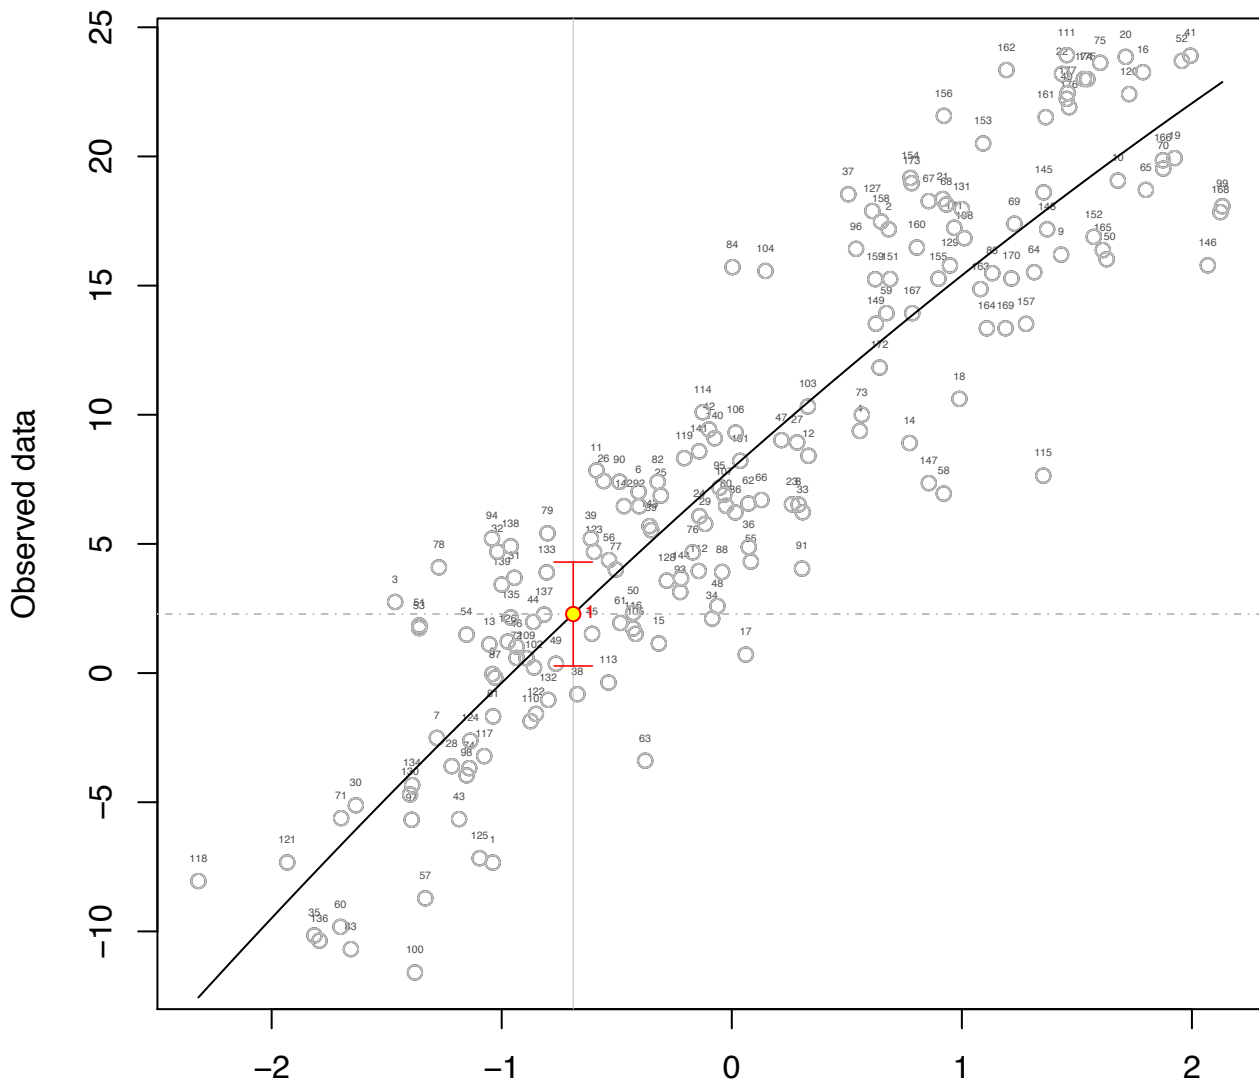

Bouchal et al. Supplementary Material S3.  
Climate parameters reconstructed  
by CLAMP. Eskihisar

GROWSEAS (months)

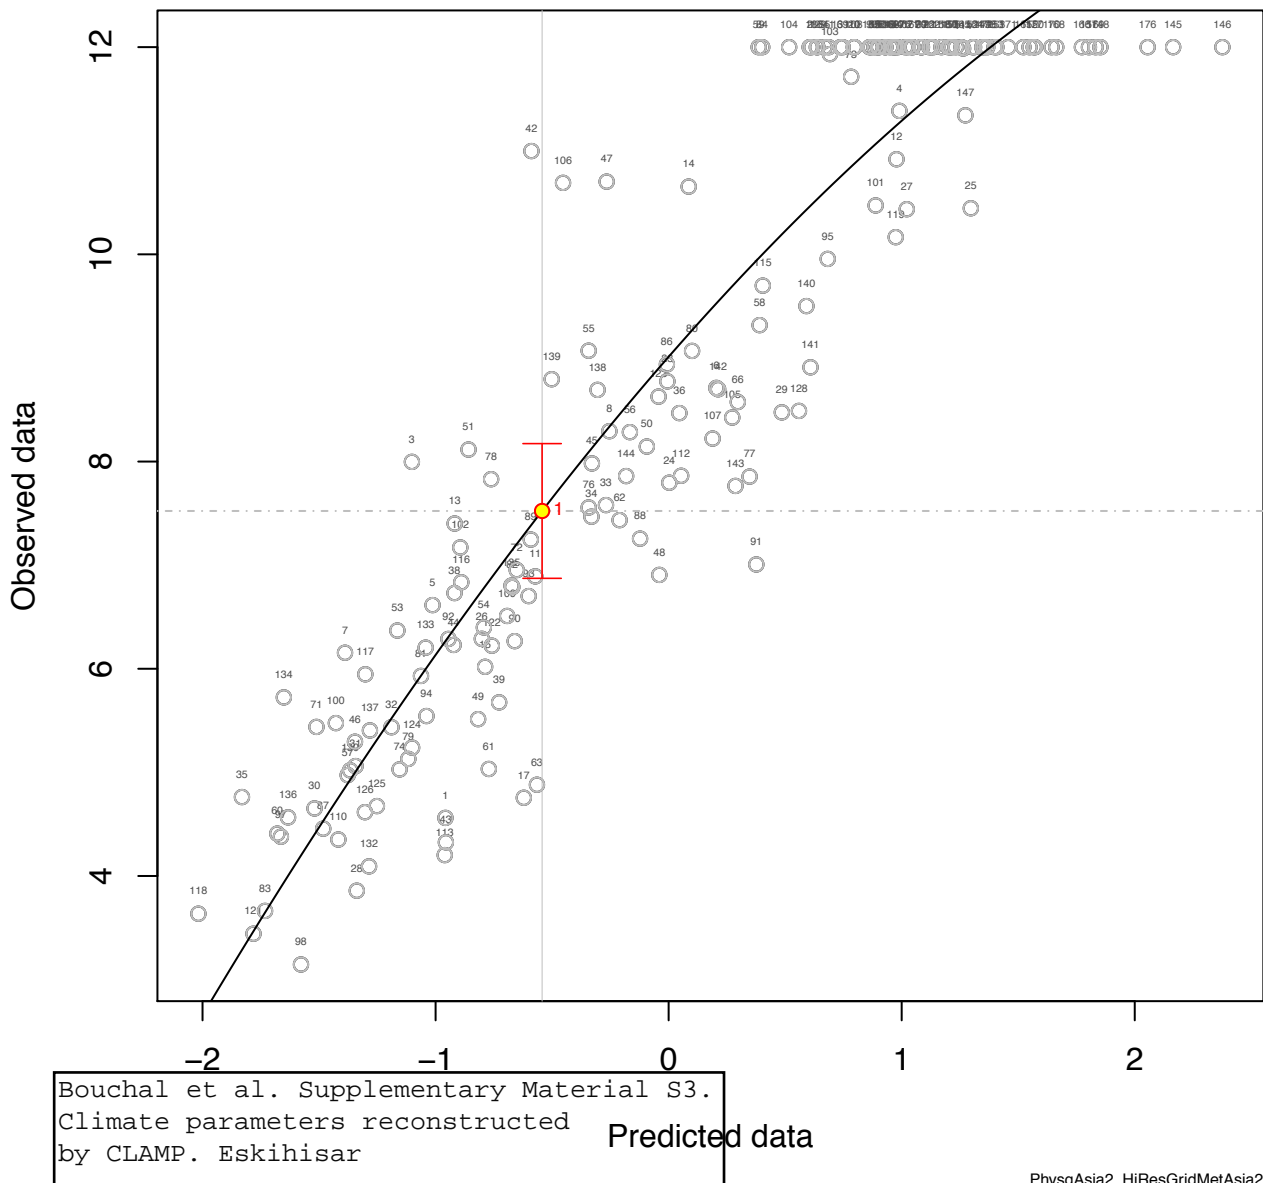



**GSP (cm)**

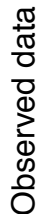

Bouchal et al. Supplementary Material S3.  
Climate parameters reconstructed by CLAMP. Eskişehir Predicted

PhylogAsia2\_HiResGridMetAsia2

MMGSP (cm)

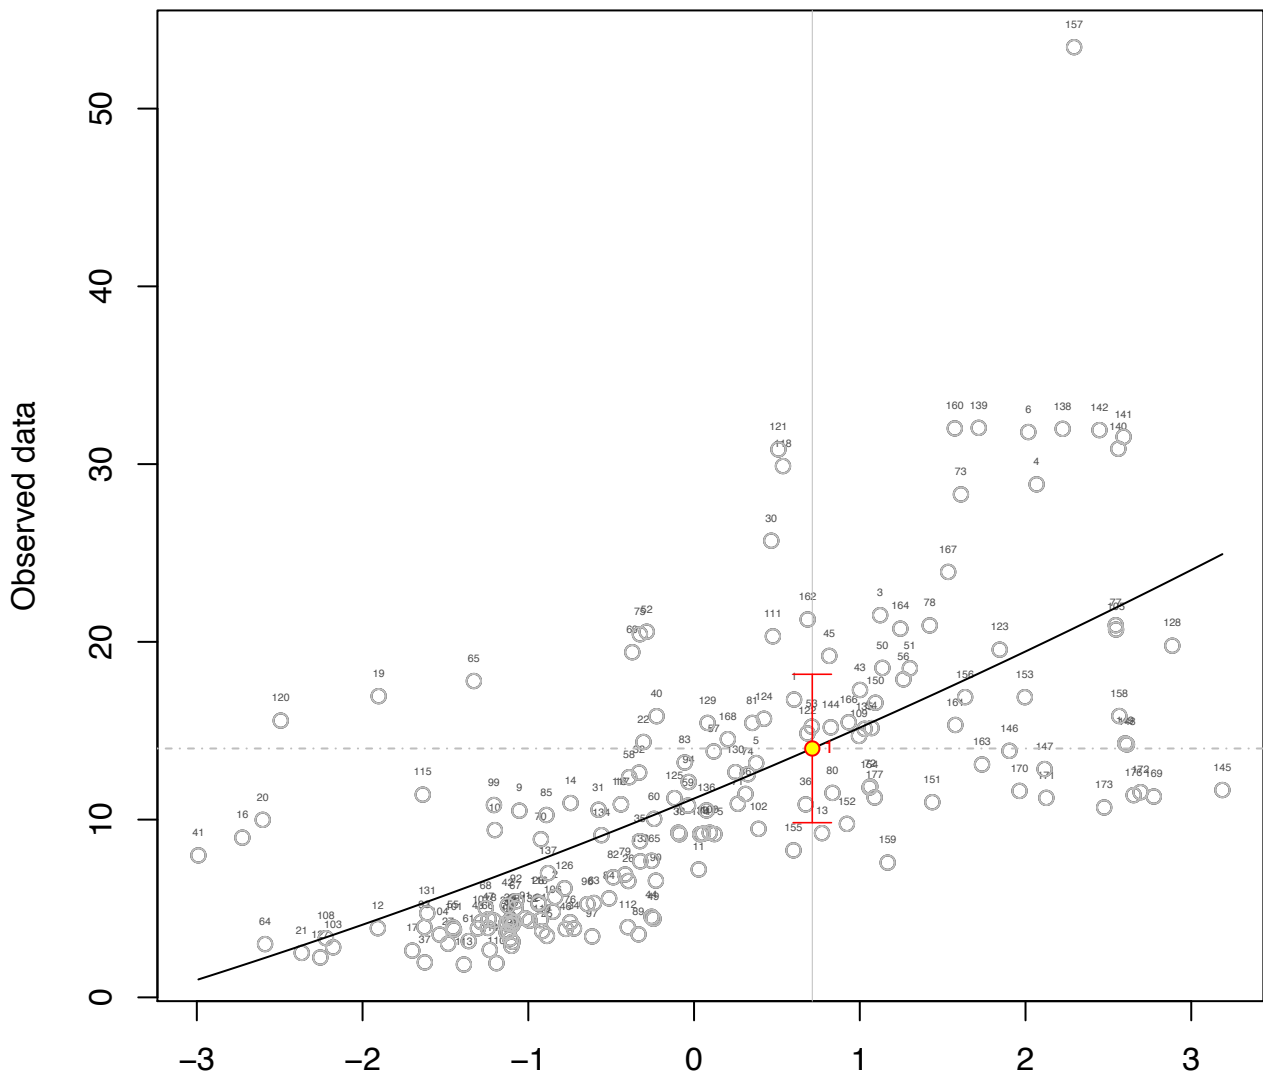

Bouchal et al. Supplementary Material S3.  
Climate parameters reconstructed  
by CLAMP. Eskihisar

Predicted data

X3.WET (cm)

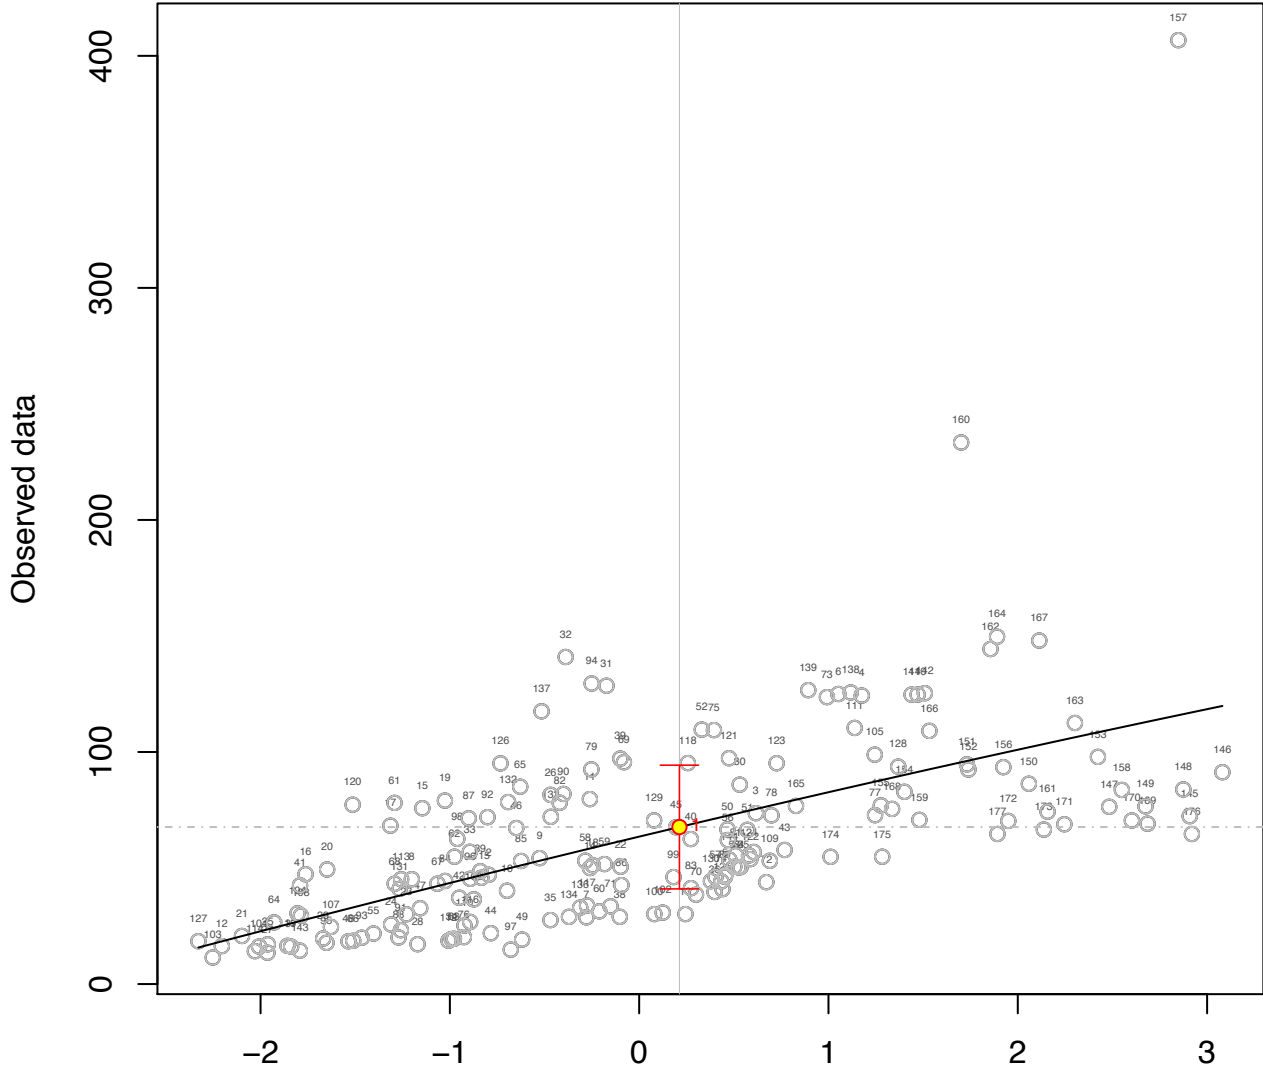

Bouchal et al. Supplementary Material S3.  
Climate parameters reconstructed  
by CLAMP. Eskihisar

Predicted data

X3.DRY (cm)

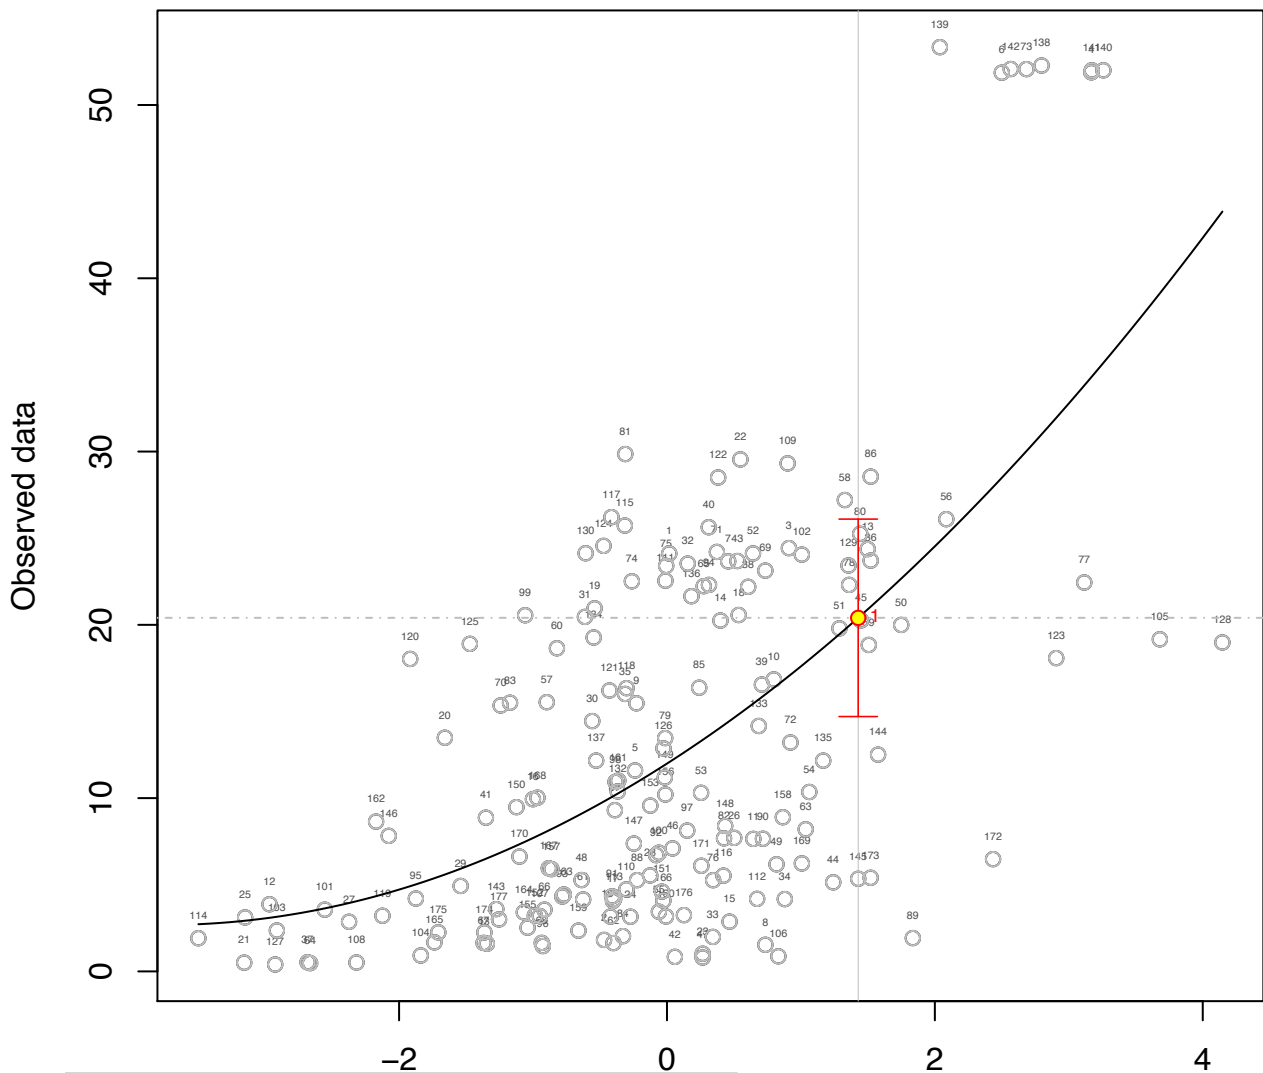

Bouchal et al. Supplementary Material S3.  
Climate parameters reconstructed  
by CLAMP. Eskihisar

RH (%)

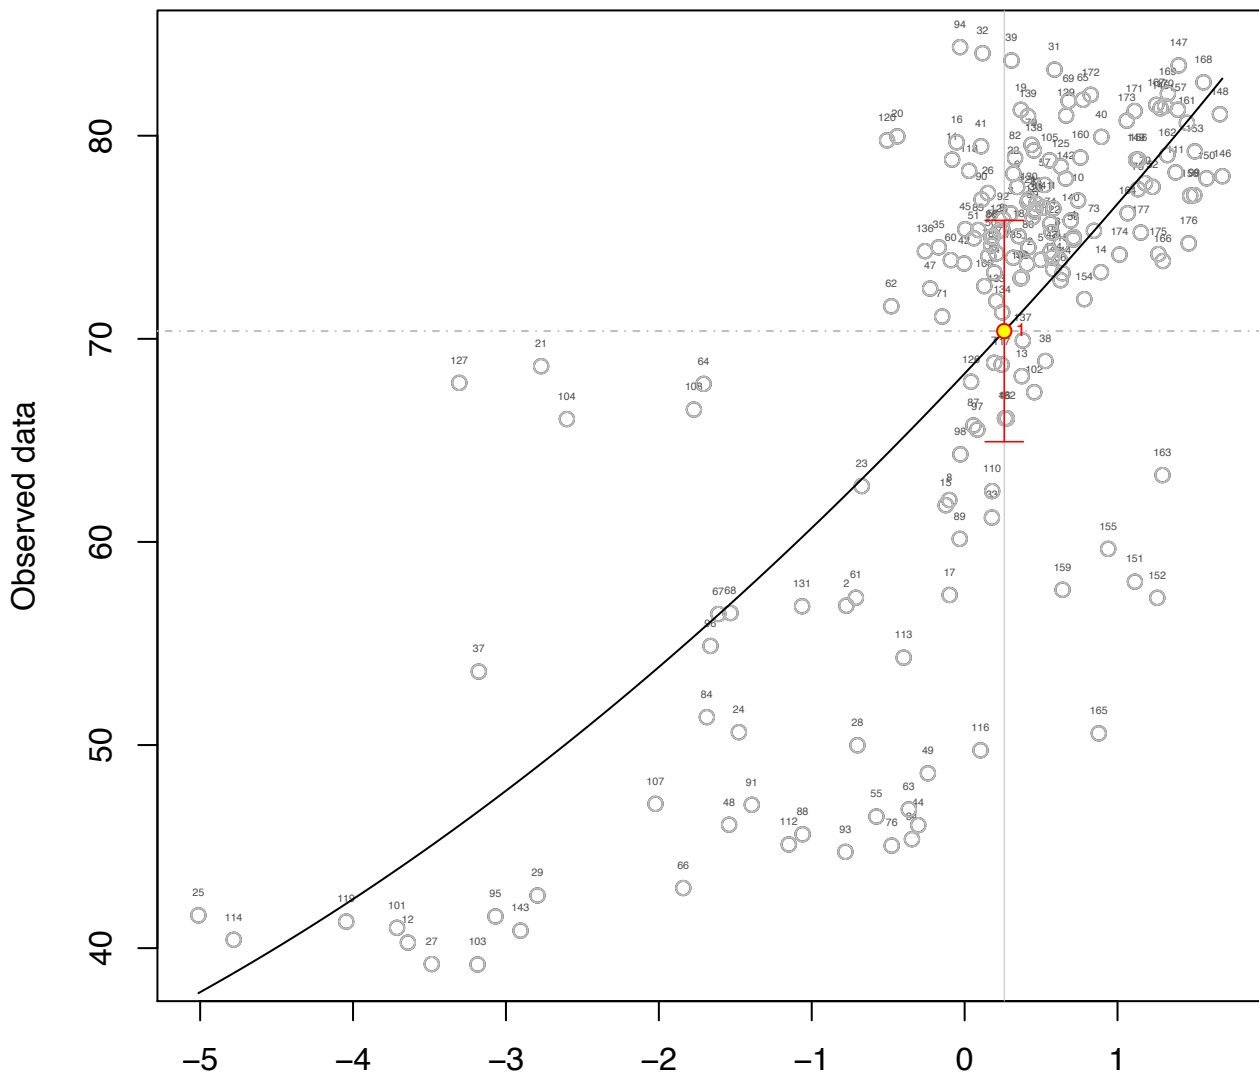

Bouchal et al. Supplementary Material S3.  
Climate parameters reconstructed  
by CLAMP. Eskihisar

Predicted data

SH (g/Kg)

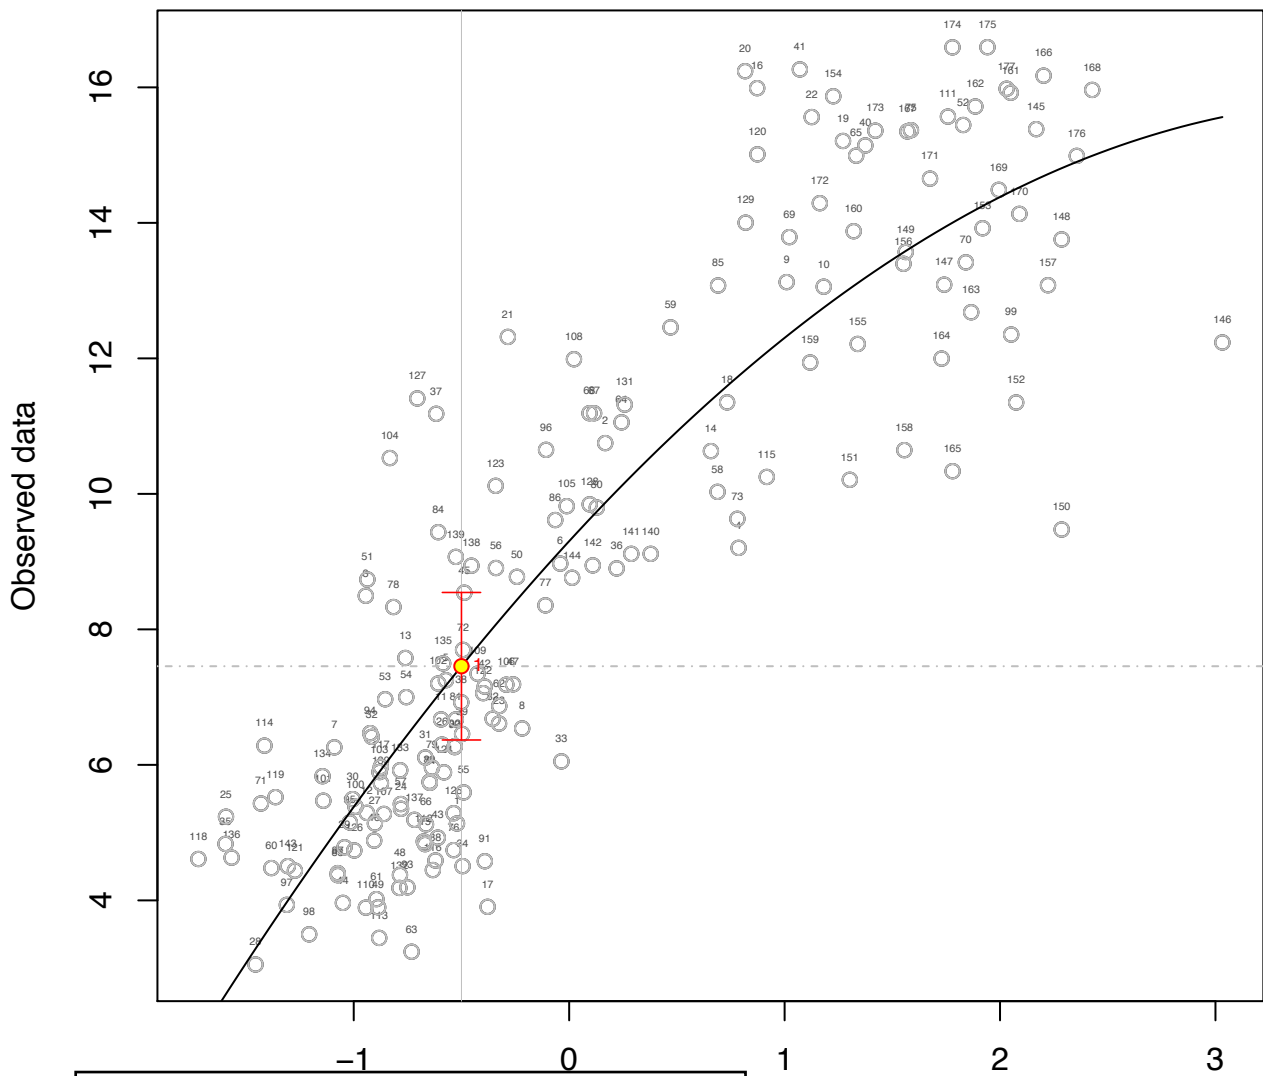

Bouchal et al. Supplementary Material S3.  
Climate parameters reconstructed  
by CLAMP. Eskihisar

Predicted data

# ENTHAL (kJ/Kg)

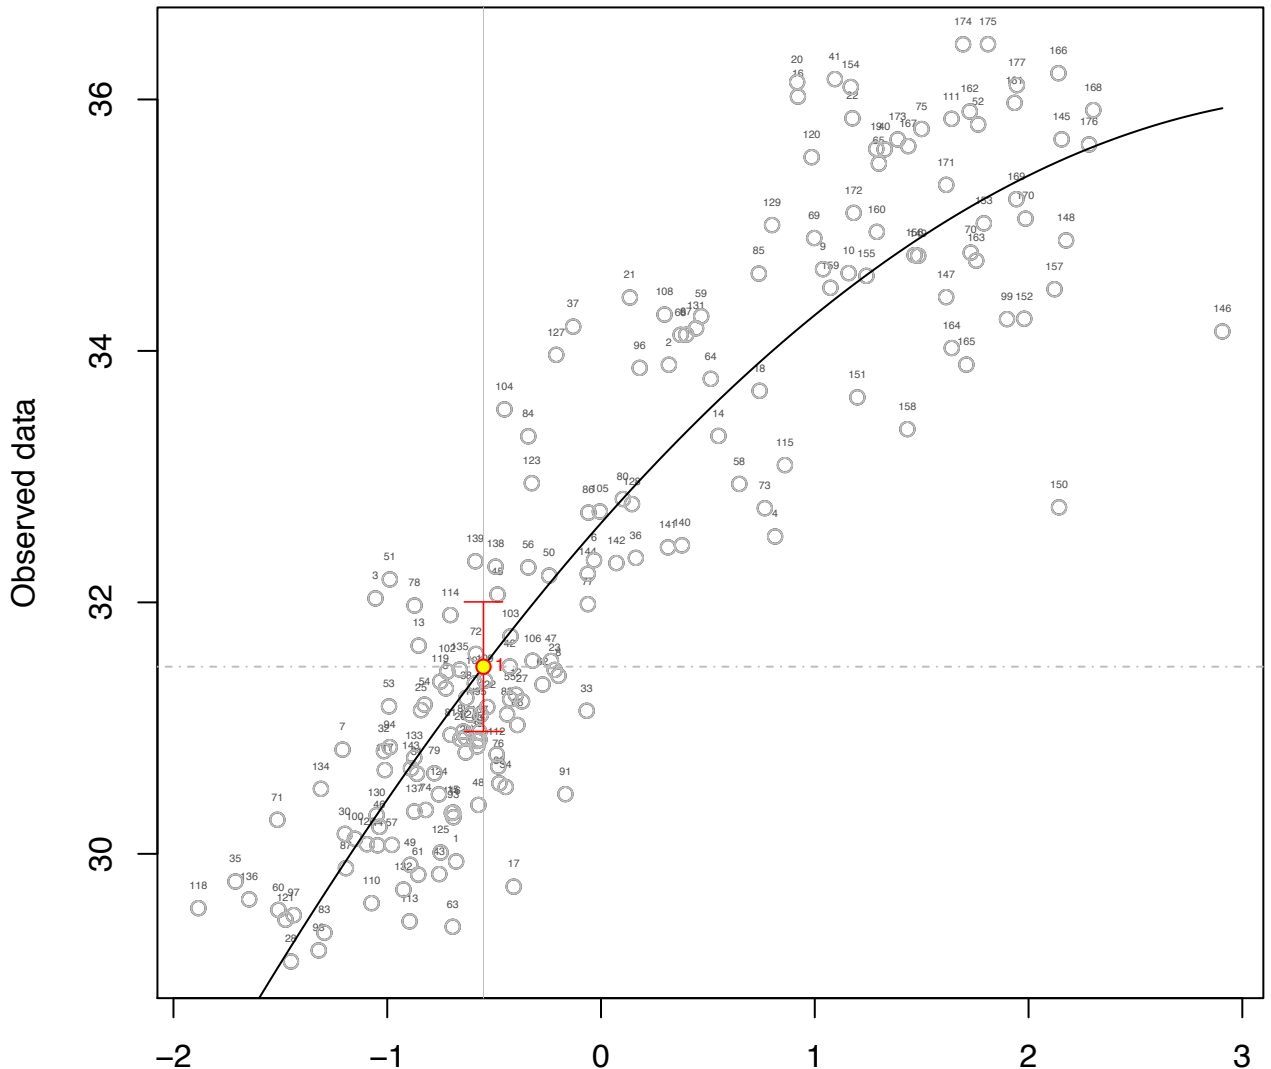

Bouchal et al. Supplementary Material S3.  
Climate parameters reconstructed  
by CLAMP. Eskihisar

Predicted data

Salihpasalar

MAT (°C)

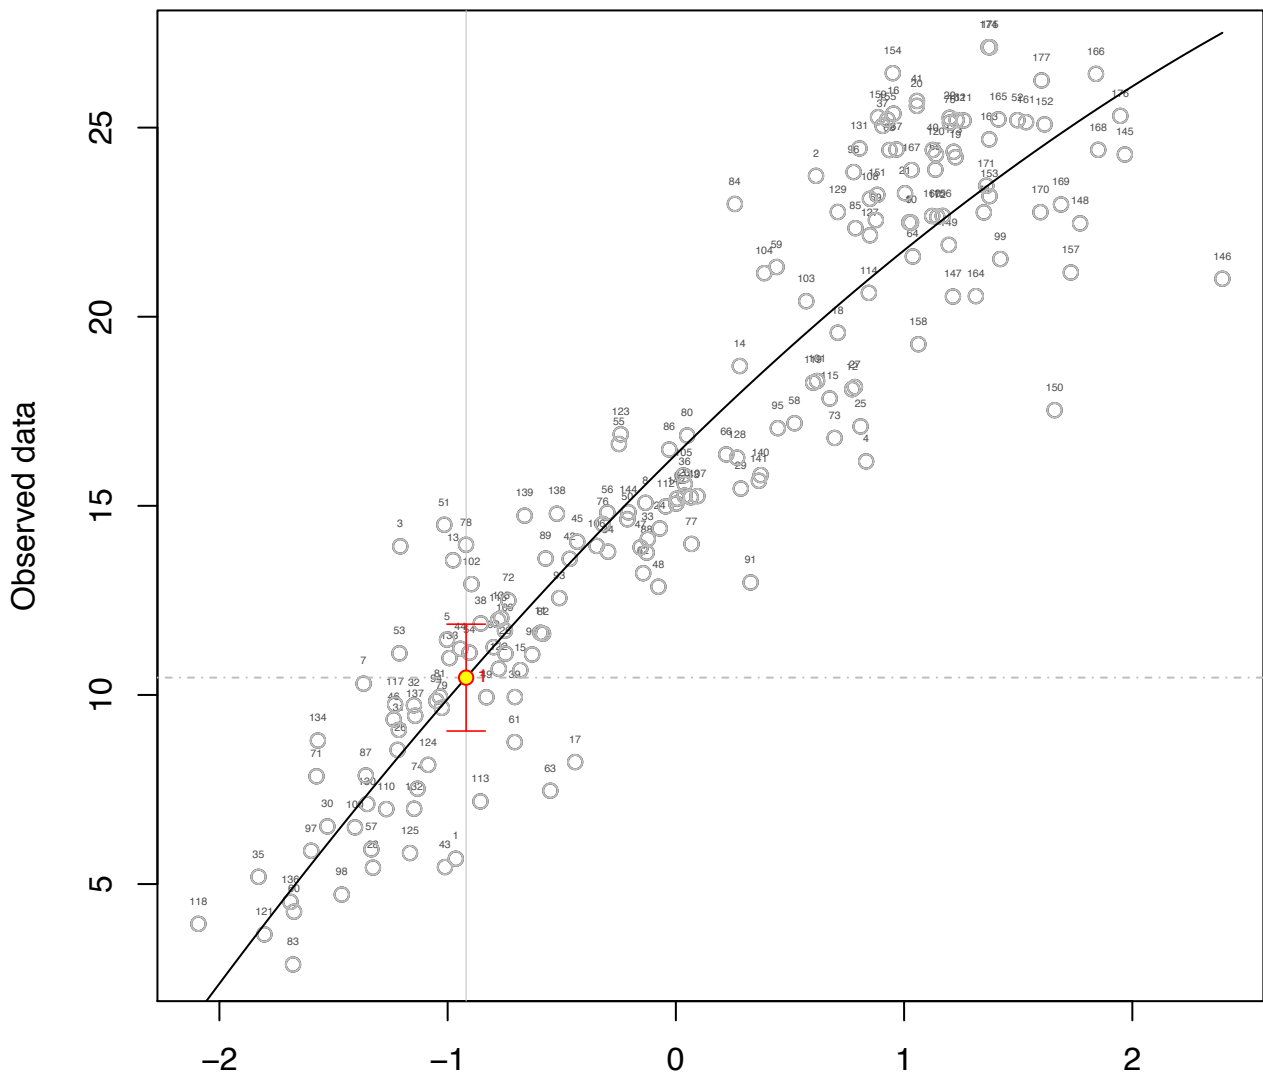

Bouchal et al. Supplementary Material S3.  
Climate parameters reconstructed  
by CLAMP. Salihpasalar

Predicted data



WMMT (°C)

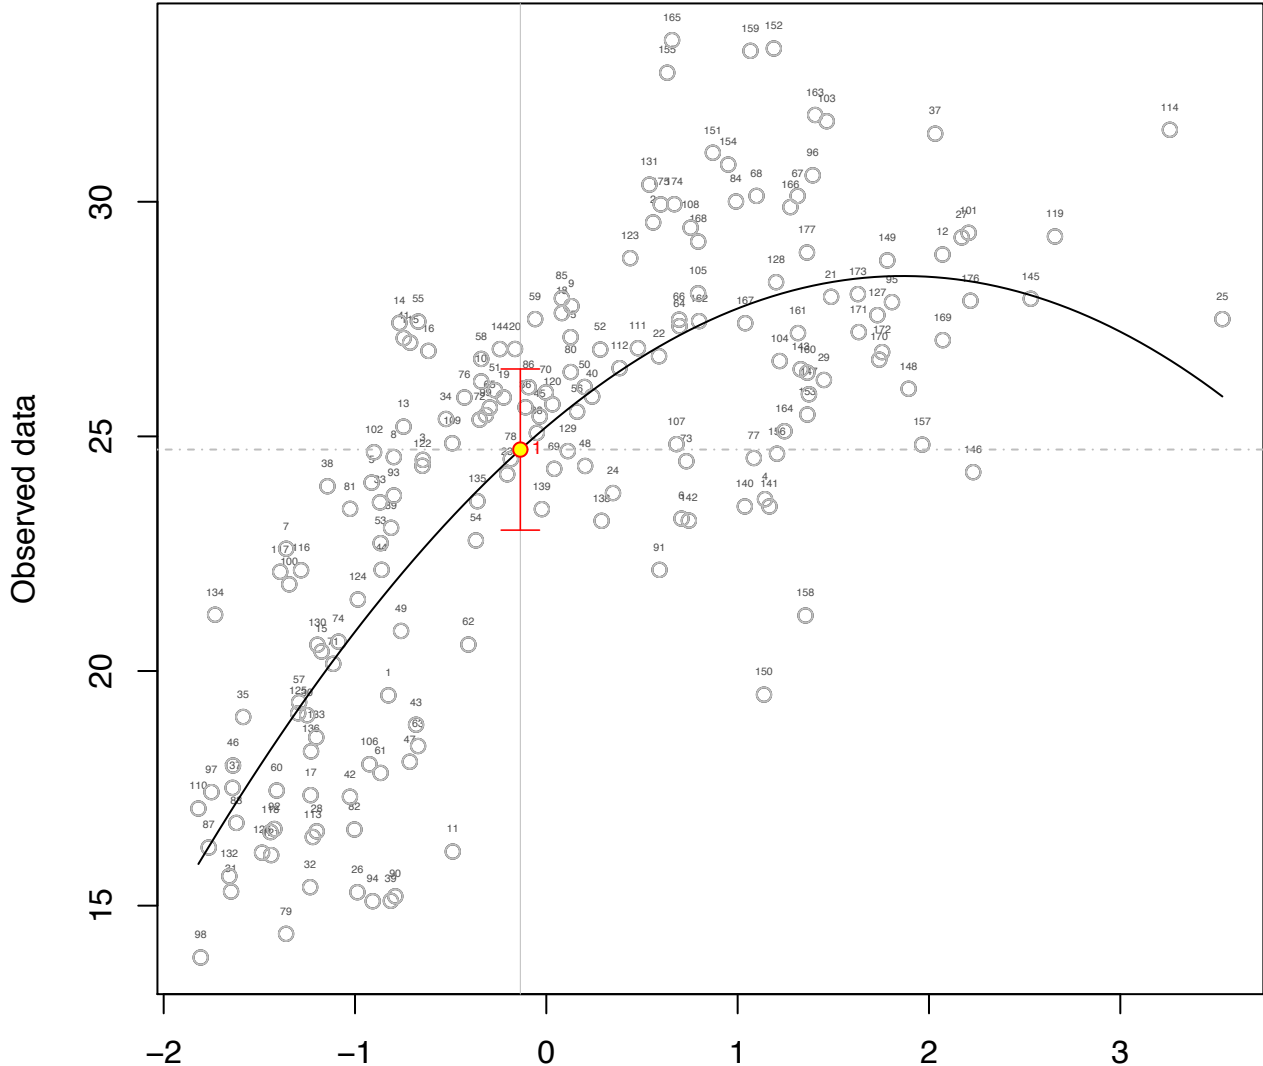

Bouchal et al. Supplementary Material S3.  
Climate parameters reconstructed  
by CLAMP. Salihpasalar

Predicted data

CMMT (°C)

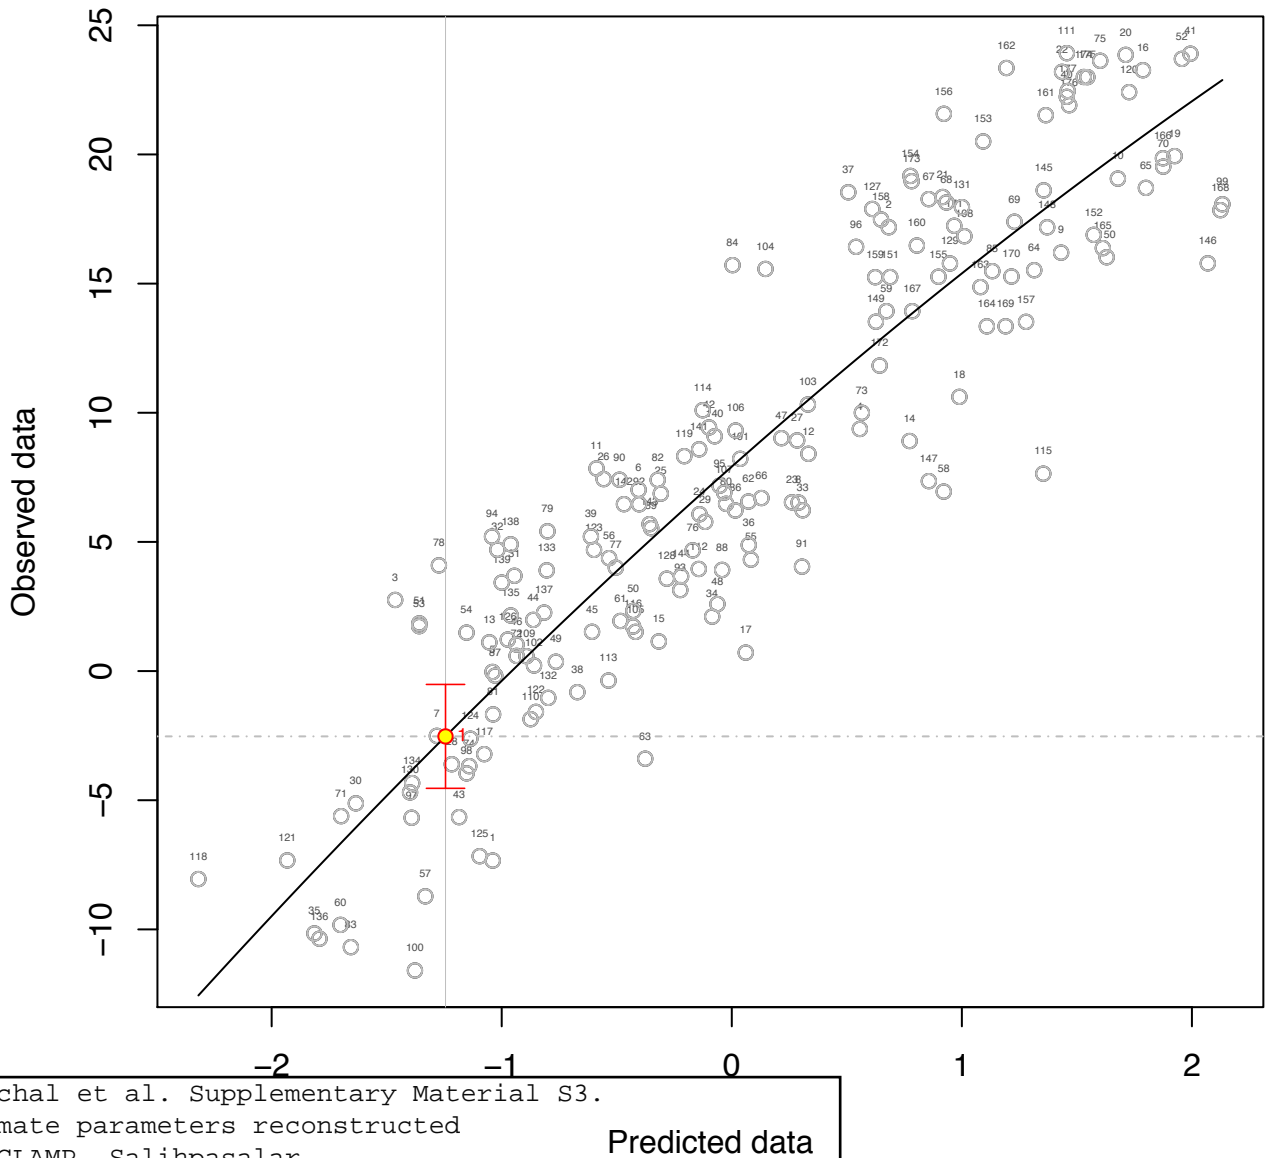

GROWSEAS (months)

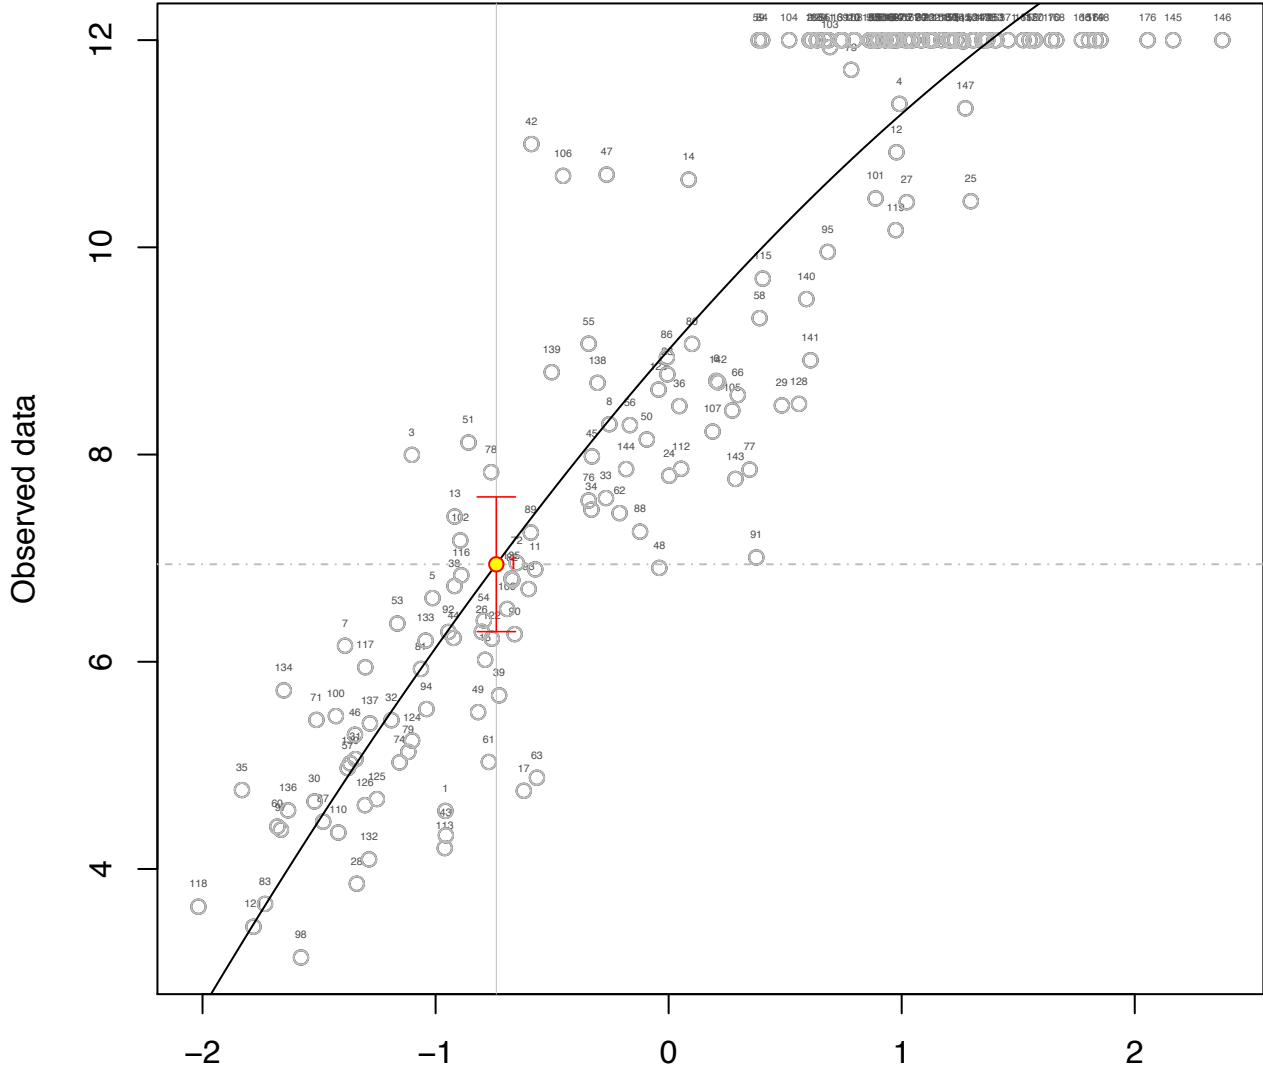

Bouchal et al. Supplementary Material S3.  
Climate parameters reconstructed  
by CLAMP. Salihpasalar

GSP (cm)

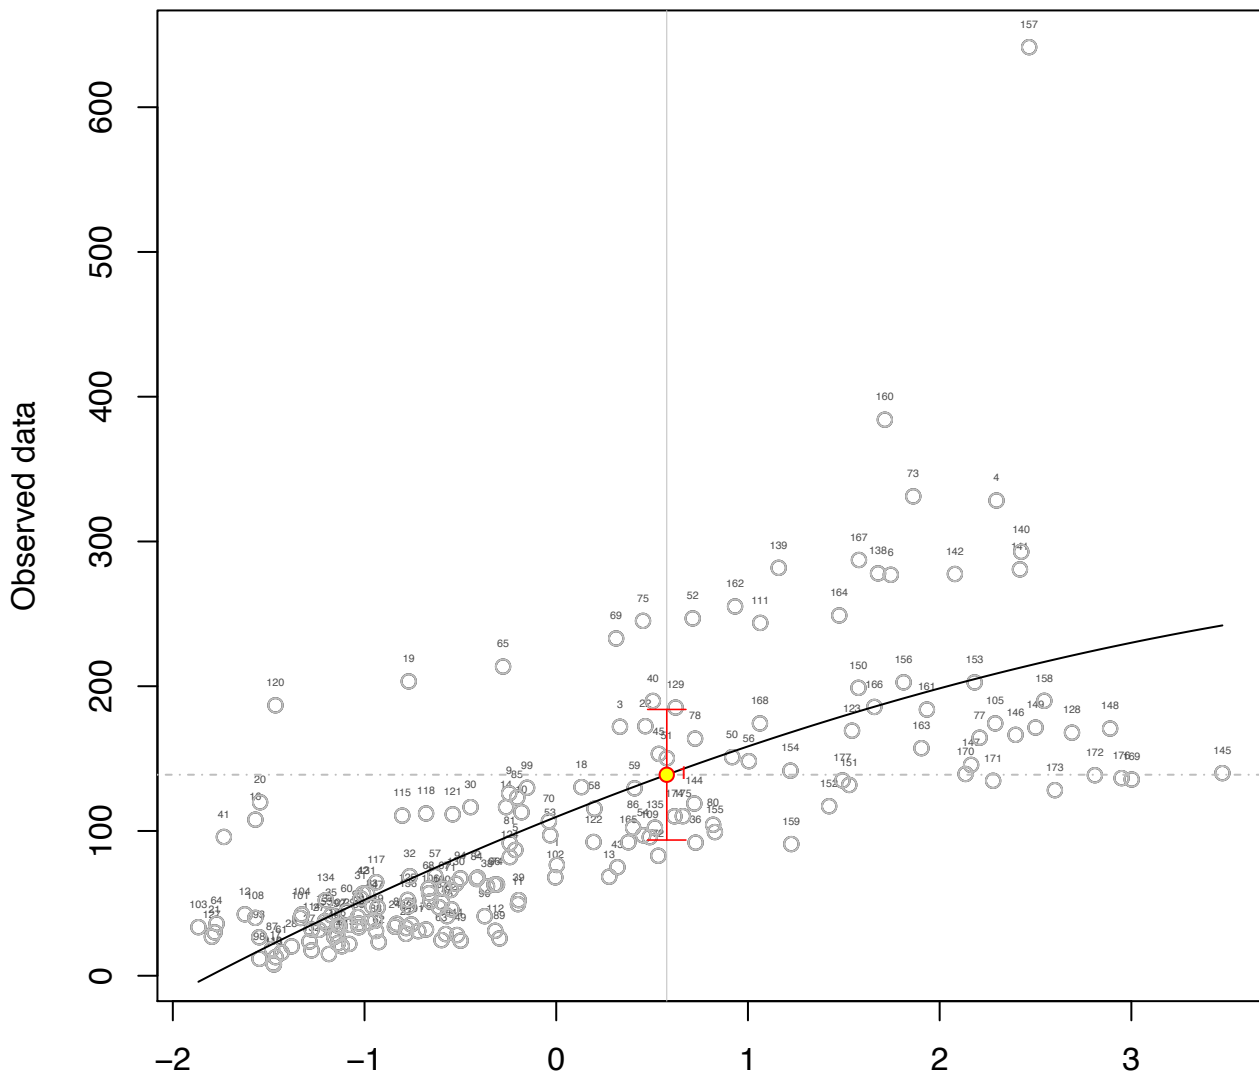

Bouchal et al. Supplementary Material S3.  
Climate parameters reconstructed  
by CLAMP. Salihpasalar

Predicted data

MMGSP (cm)

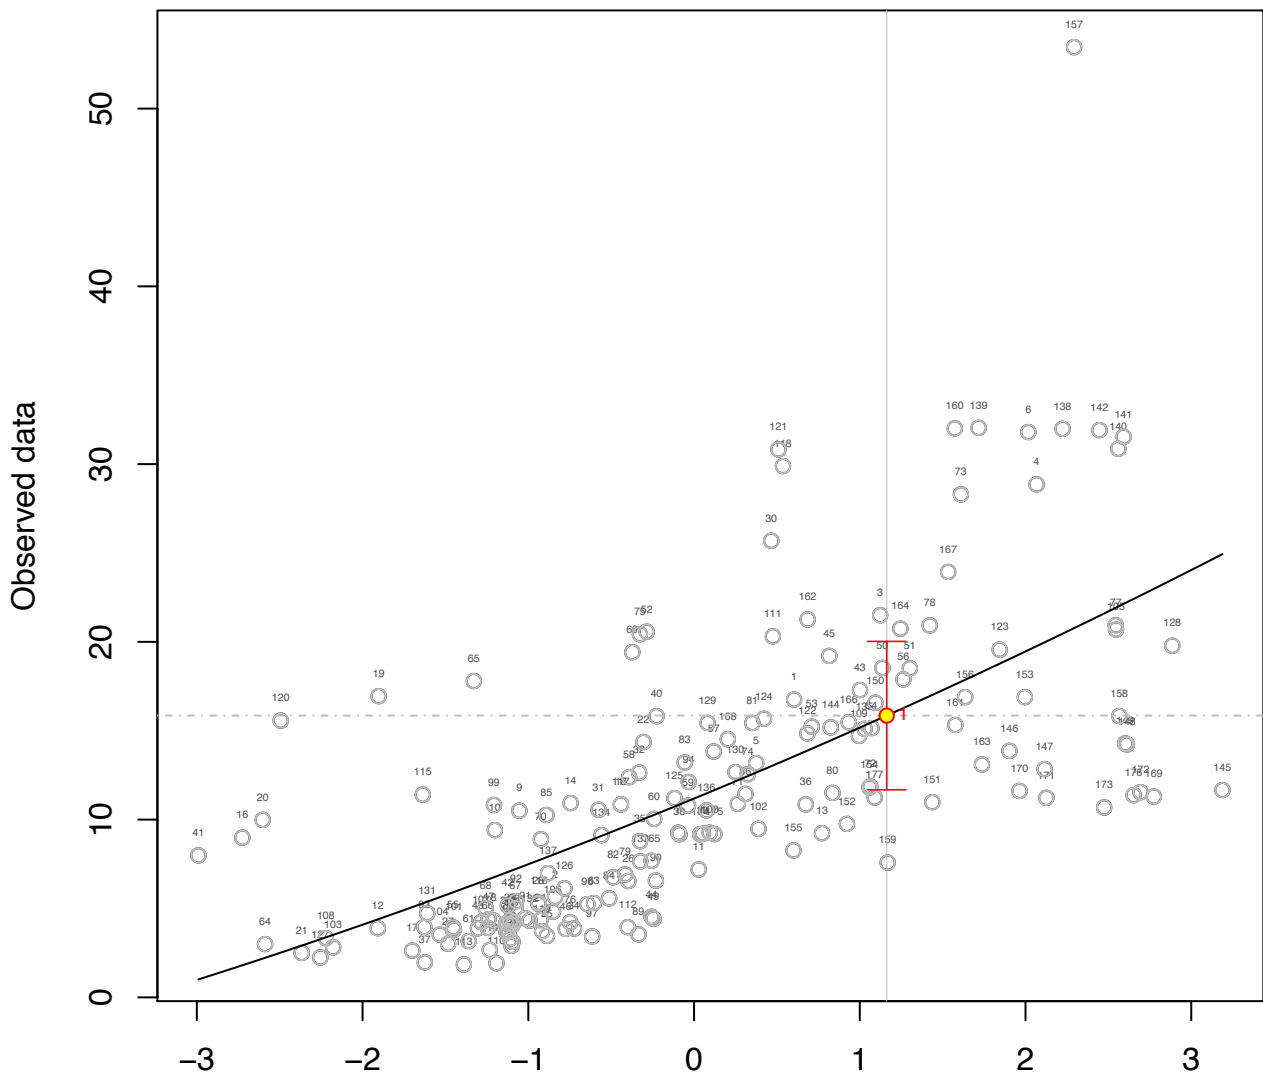

Bouchal et al. Supplementary Material S3.  
Climate parameters reconstructed by CLAMP. Salihpasalar

Predicted data

X3.WET (cm)

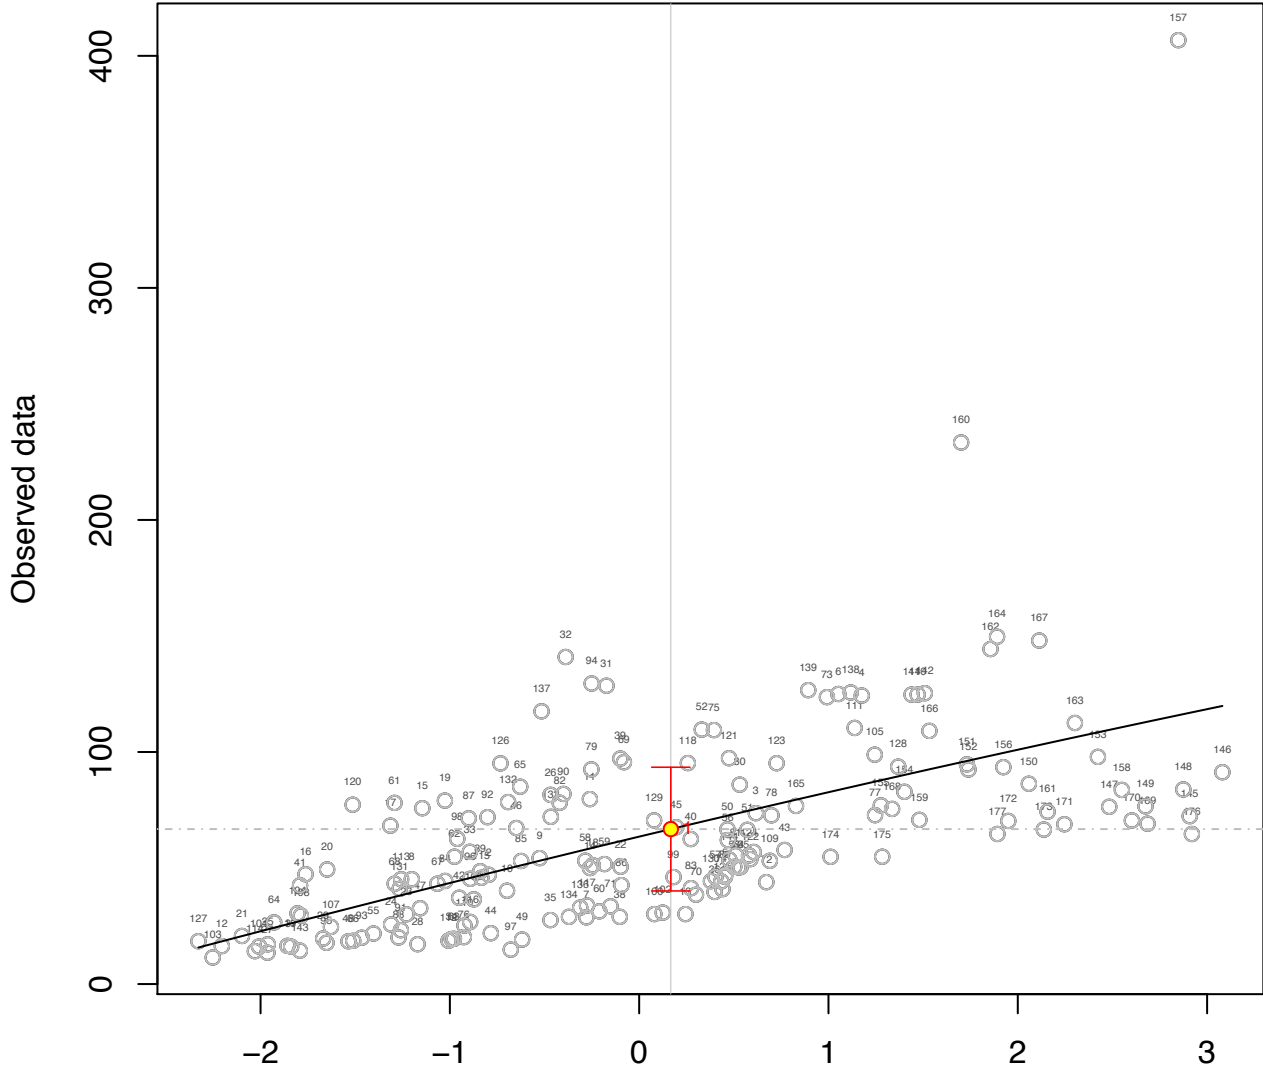

Bouchal et al. Supplementary Material S3.  
Climate parameters reconstructed  
by CLAMP. Salihpasalar

X3.DRY (cm)

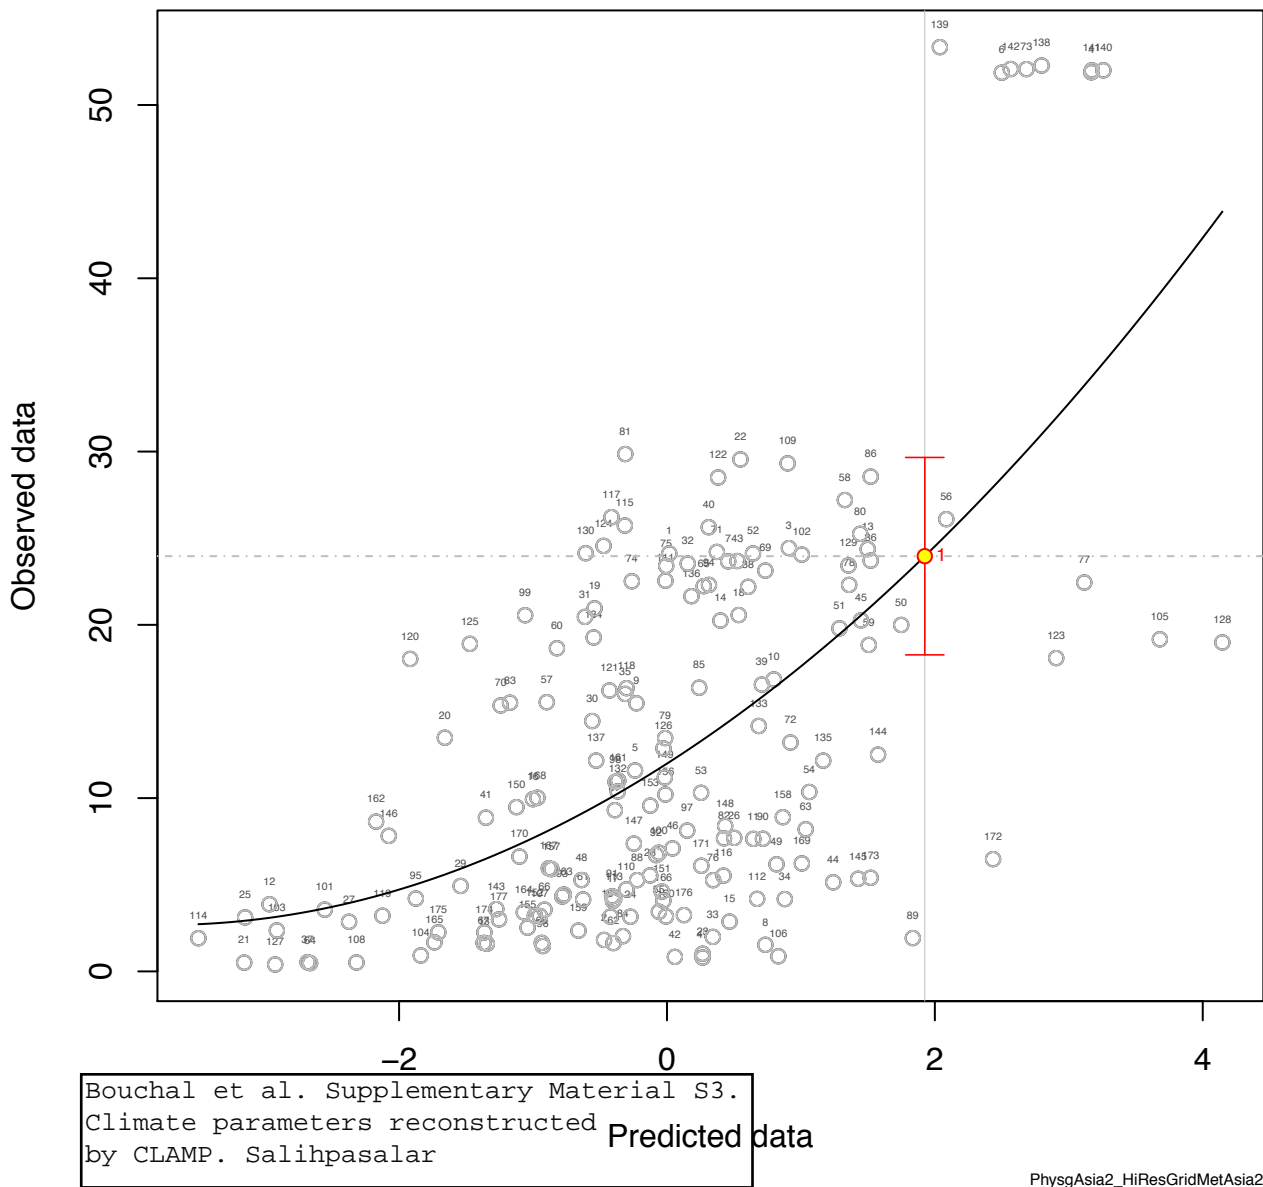

RH (%)

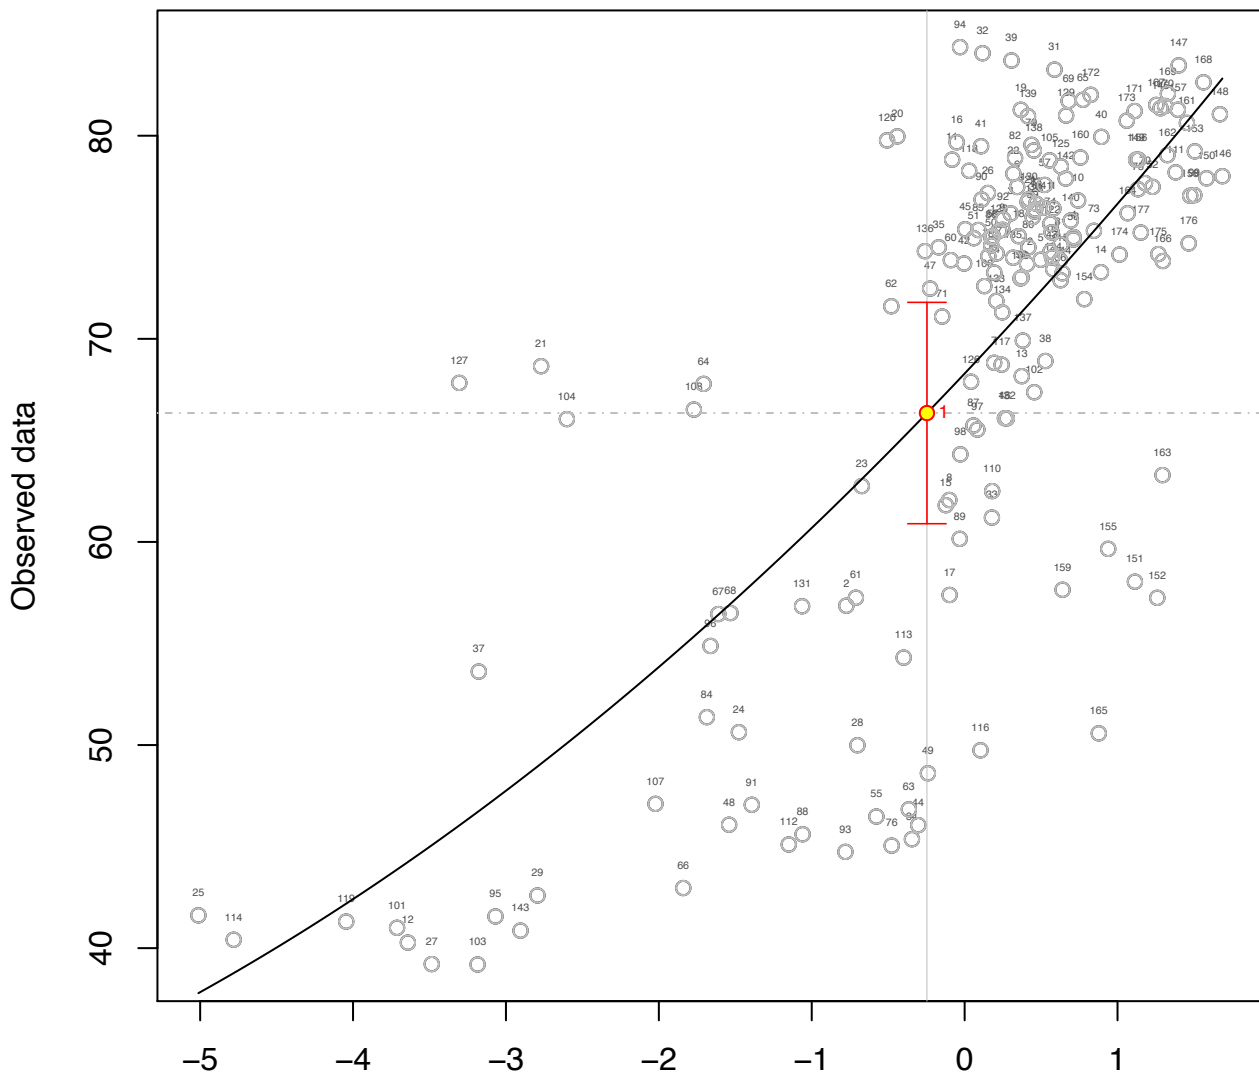

Bouchal et al. Supplementary Material S3.  
Climate parameters reconstructed by CLAMP. Salihpasalar



SH (g/Kg)

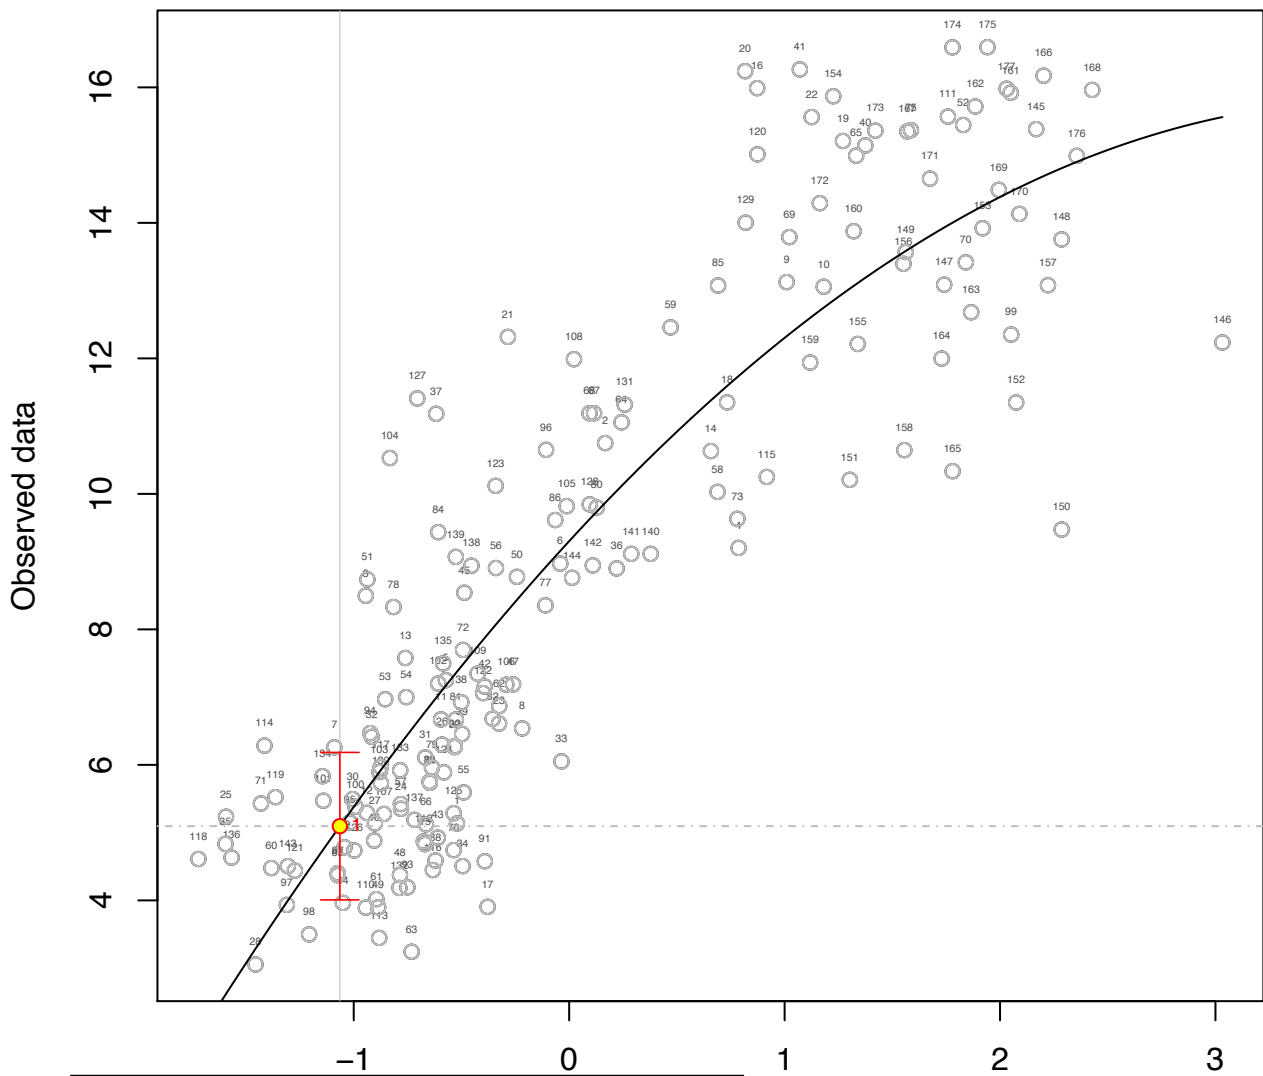

Bouchal et al. Supplementary Material S3.  
Climate parameters reconstructed  
by CLAMP. Salihpasalar

Predicted data

ENTHAL (kJ/Kg)

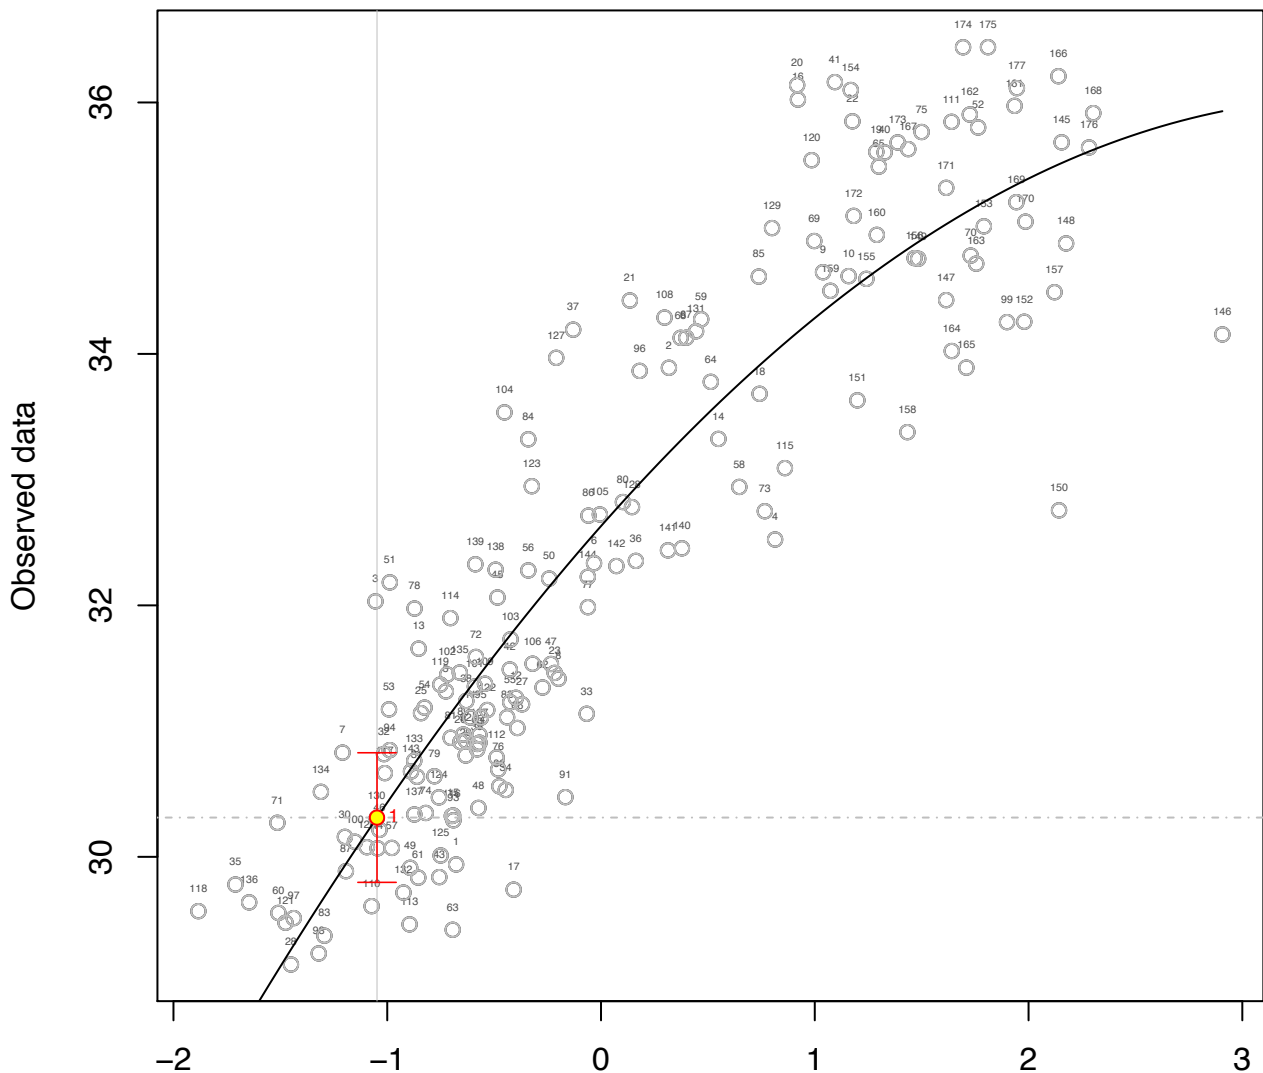

Bouchal et al. Supplementary Material S3.  
Climate parameters reconstructed  
by CLAMP. Salihpasalar

Predicted data
