# Supplementary material for: Middle Miocene climate of southwestern Anatolia from multiple botanical proxies
Source: Copernicus journal article supplement (doi:10.5194/cp-14-1427-2018), 2018-10-17
Supplement: Supplementary file 2 [file Bouchal et al S_4 percent_climtypes.pdf › SI1-7/Bouchal et al S_4 percent_climtypes.pdf]

Bouchal et al., Supplementary Material S4  
Heat maps showing precise representation of different Köppen-Geiger  
climate types for all fossil assemblages.
