# Supplementary material for: Middle Miocene climate of southwestern Anatolia from multiple botanical proxies
Source: Copernicus journal article supplement (doi:10.5194/cp-14-1427-2018), 2018-10-17
Supplement: Supplementary file 3 [file Bouchal et al S_5 add_Ko݈ppsig diagrOPZ3.pdf › SI1-7/Bouchal et al S_5 add_Ko݈ppsig diagrOPZ3.pdf]

# Taxa list without gymnosperms

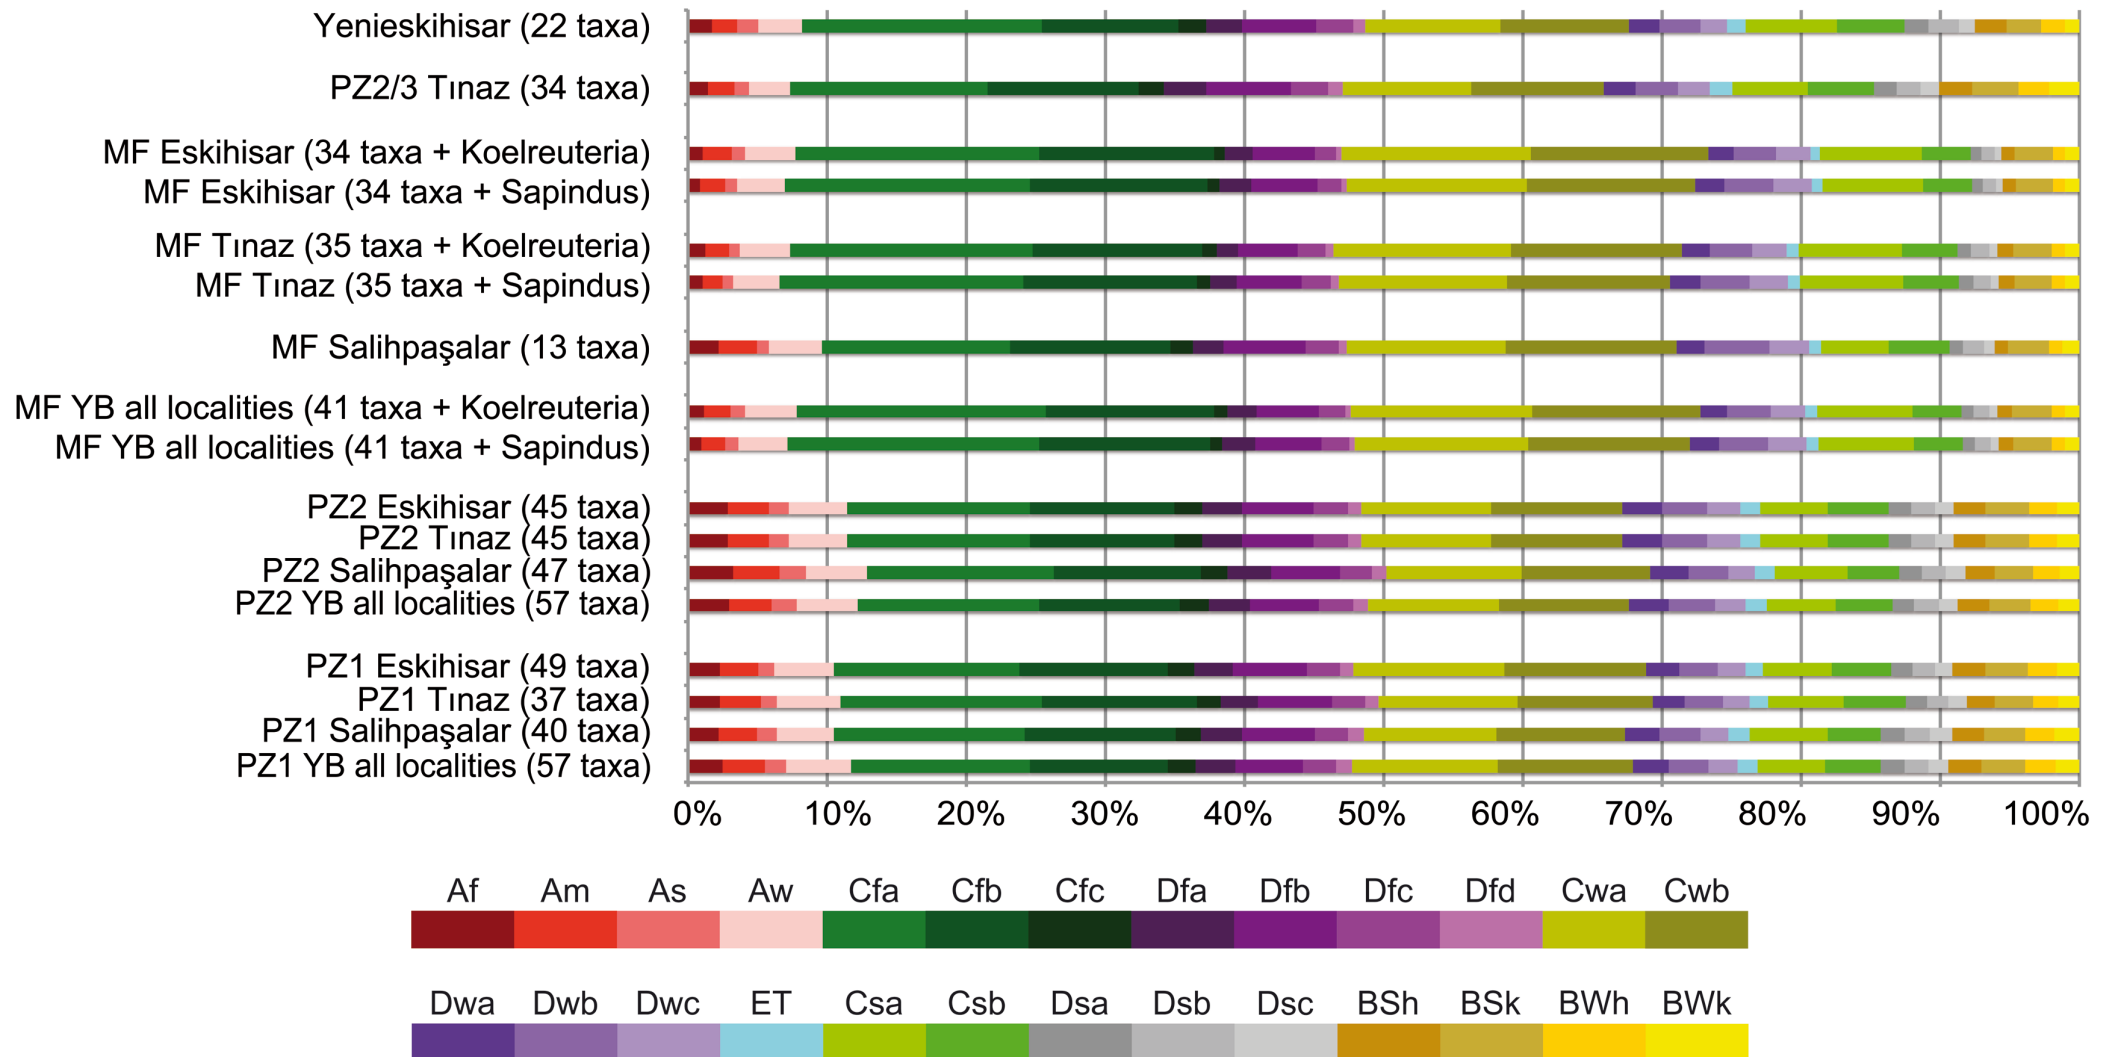

Bouchal et al. Supplementary Material S5.  
Köppen signature diagrams excluding cosmopolitan and gymnospermous taxa.

# Taxa list without purely azonal elements

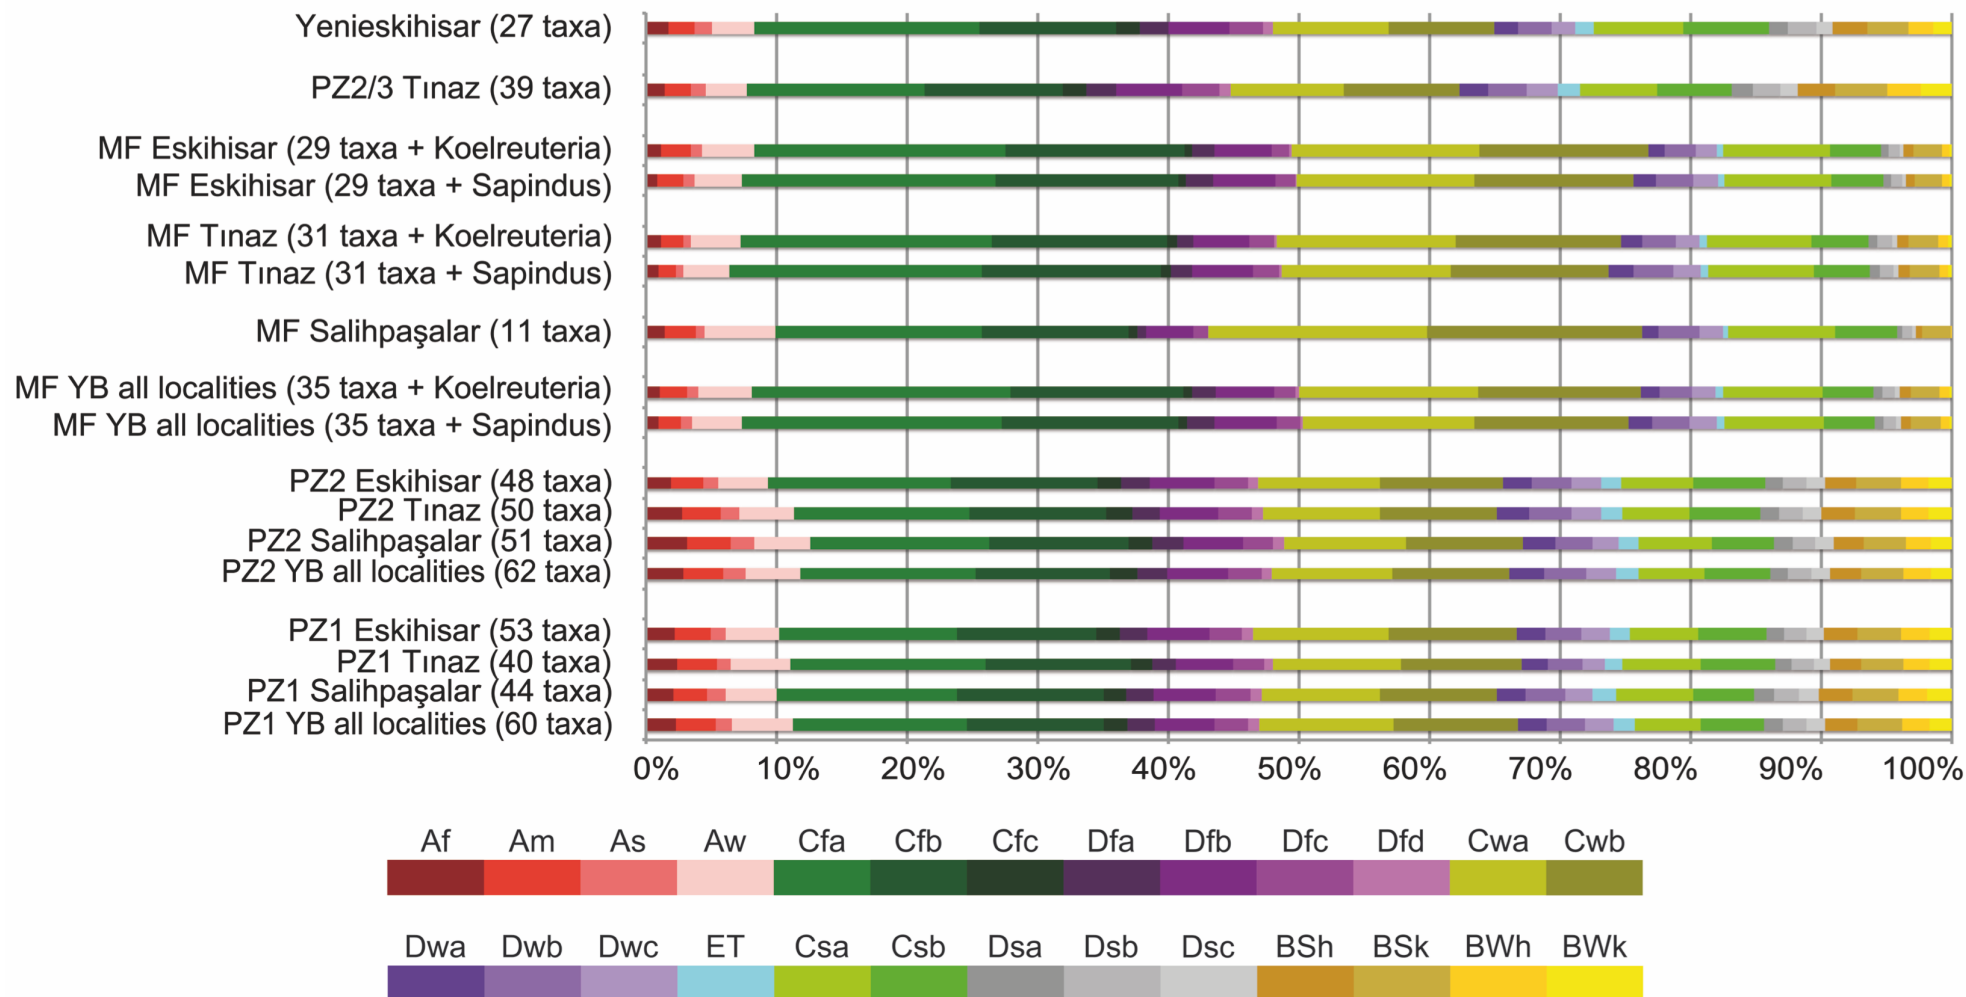

Bouchal et al. Supplementary Material S5.  
Köppen signature diagrams excluding cosmopolitan and gymnospermous taxa.

# Taxa list without cosmopolitan elements

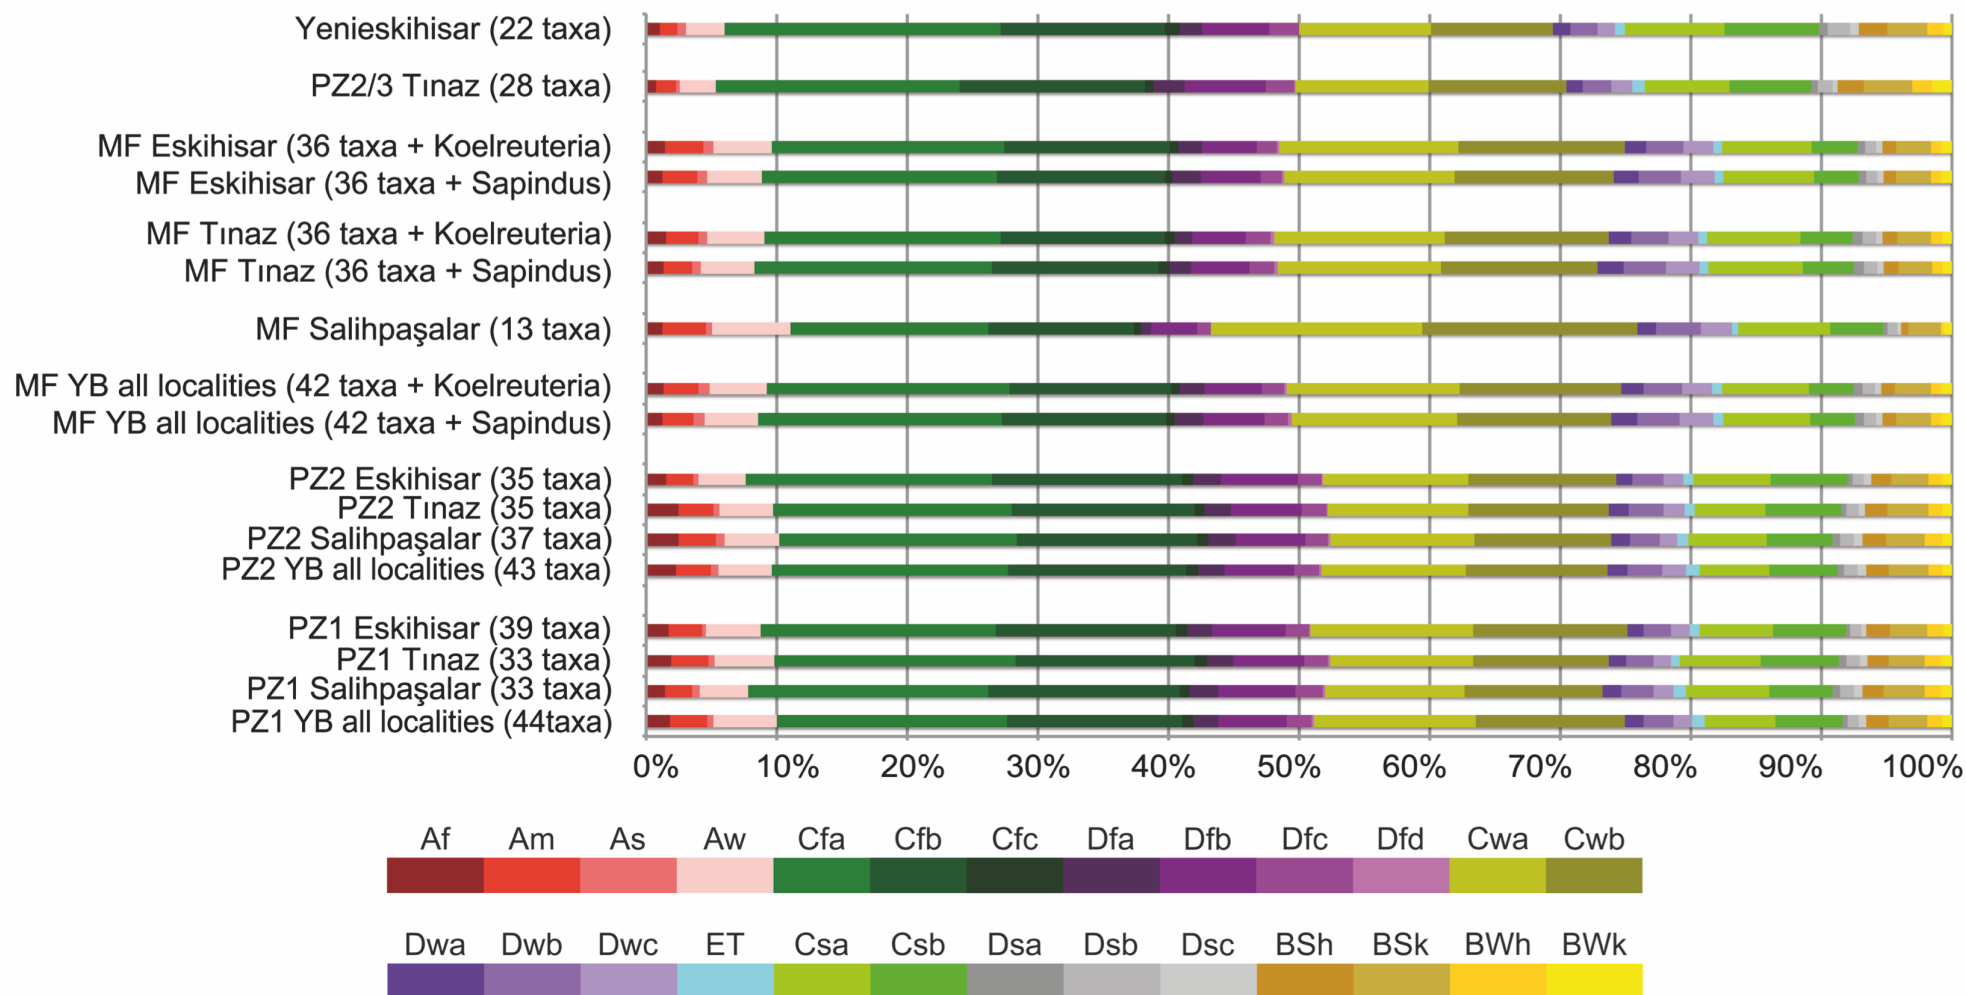

Bouchal et al. Supplementary Material S5.  
Köppen signature diagrams excluding cosmopolitan and gymnospermous taxa.
