# Supplementary material for: Middle Miocene climate of southwestern Anatolia from multiple botanical proxies
Source: Copernicus journal article supplement (doi:10.5194/cp-14-1427-2018), 2018-10-17
Supplement: Supplementary file 4 [file Bouchal et al S_6 AP_NAP ratios.pdf › SI1-7/Bouchal et al S_6 AP_NAP ratios.pdf]

Supplementary Material 6 (1)

Tinaz section (Bouchal et al. 2017)

| NRM no. | GYM%  | A ANGIOS% | NA ANGIOS% | FERN% | GYM+A AN% | FERN+NA % | GYM+A AN / FERN+NA | ANGIOS    |
|---------|-------|-----------|------------|-------|-----------|-----------|--------------------|-----------|
| S153594 | 46,5  | 24,75     | 8,25       | 13,25 | 76,82     | 23,18     | 0,8962264          | 0,1037736 |
| S153595 | 42    | 48,75     | 3          | 4,25  | 92,60     | 7,40      | 0,968              | 0,032     |
| S153596 | 0     | 0         | 0          | 0     | 0,00      | 0,00      | 0                  | 0         |
| S153597 | 0     | 0         | 0          | 0     | 0,00      | 0,00      | 0                  | 0         |
| S153598 | 3,25  | 16,25     | 5,25       | 59,75 | 23,08     | 76,92     | 0,7878788          | 0,2121212 |
| S153599 | 26,25 | 46,75     | 8,25       | 12,25 | 78,07     | 21,93     | 0,8984615          | 0,1015385 |
| S153600 | 0     | 0         | 0          | 0     | 0,00      | 0,00      | 0                  | 0         |
| S153601 | 9,75  | 32,75     | 27,75      | 3     | 58,02     | 41,98     | 0,6049822          | 0,3950178 |
| S153602 | 39,5  | 51,75     | 6,25       | 2     | 91,71     | 8,29      | 0,9358974          | 0,0641026 |
| S153603 | 34,25 | 38        | 23,25      | 2,25  | 73,91     | 26,09     | 0,7565445          | 0,2434555 |
| S153604 | 34,25 | 56        | 8,5        | 1,25  | 90,25     | 9,75      | 0,9139241          | 0,0860759 |
| S153605 | 13    | 23        | 57,25      | 2,75  | 37,50     | 62,50     | 0,386059           | 0,613941  |
| S153606 | 11,75 | 39,25     | 46         | 0,5   | 52,31     | 47,69     | 0,5257732          | 0,4742268 |
| S153607 | 0     | 0         | 0          | 0     | 0,00      | 0,00      | 0                  | 0         |
| S153608 | 10    | 13,5      | 57,5       | 4,5   | 27,49     | 72,51     | 0,2901235          | 0,7098765 |
| S153609 | 0     | 0         | 0          | 0     | 0,00      | 0,00      | 0                  | 0         |
| S153610 | 21,75 | 28,75     | 28,25      | 4,25  | 60,84     | 39,16     | 0,6412698          | 0,3587302 |
| S153611 | 0     | 0         | 0          | 0     | 0,00      | 0,00      | 0                  | 0         |
| S153612 | 0     | 0         | 0          | 0     | 0,00      | 0,00      | 0                  | 0         |
| S153613 | 0     | 0         | 0          | 0     | 0,00      | 0,00      | 0                  | 0         |
| S153614 | 0     | 0         | 0          | 0     | 0,00      | 0,00      | 0                  | 0         |
| S153615 | 0     | 0         | 0          | 0     | 0,00      | 0,00      | 0                  | 0         |
| S153616 | 0     | 0         | 0          | 0     | 0,00      | 0,00      | 0                  | 0         |
| S153617 | 7,75  | 13        | 65,25      | 12    | 21,17     | 78,83     | 0,2412791          | 0,7587209 |
| S153618 | 0     | 0         | 0          | 0     | 0,00      | 0,00      | 0                  | 0         |
| S153619 | 0     | 0         | 0          | 0     | 0,00      | 0,00      | 0                  | 0         |
| S153620 | 0     | 0         | 0          | 0     | 0,00      | 0,00      | 0                  | 0         |

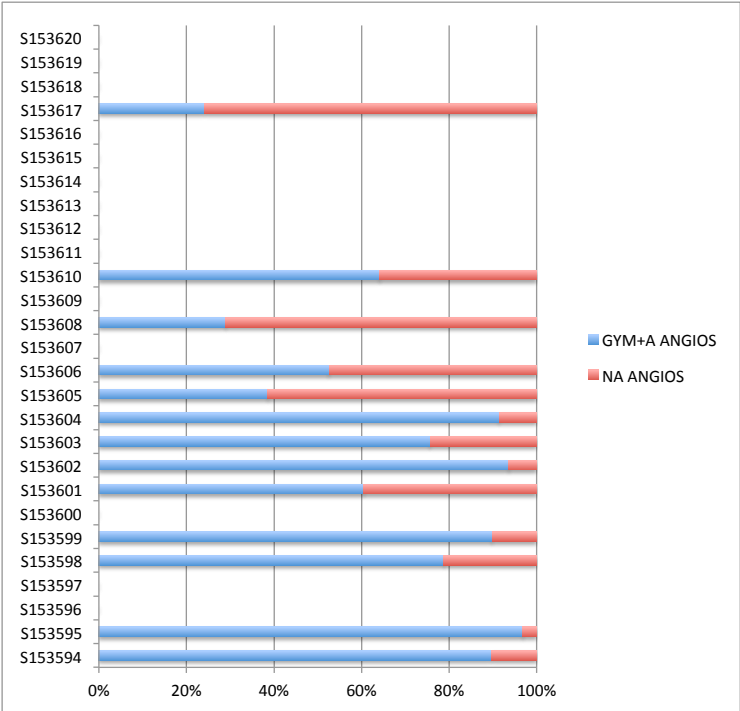

Bouchal et al. Supplementary Material S6 (1)  
Arboreal to non-arboreal pollen ratios for three sections, of the Yatağan Basin.

Supplementary Material 6 (2)

Eskihisar section (Bouchal et al. 2016)

| NRM no. | GYM%  | A ANGIOS% | NA ANGIOS% | FERN% | GYM+A ANI | FERN+NA / | GYM+A ANI/NA ANGIOS |
|---------|-------|-----------|------------|-------|-----------|-----------|---------------------|
| S153539 | 22,75 | 49        | 16         | 11,5  | 72,29     | 27,71     | 0,8176638 0,1823362 |
| S153540 | 26,75 | 47        | 13         | 11,75 | 74,87     | 25,13     | 0,8501441 0,1498559 |
| S153541 | 18,25 | 56,75     | 8          | 15,75 | 75,95     | 24,05     | 0,9036145 0,0963855 |
| S153542 | 22    | 48,5      | 13,75      | 14,5  | 71,39     | 28,61     | 0,8367953 0,1632047 |
| S153543 | 23    | 52,75     | 4,25       | 18,25 | 77,10     | 22,90     | 0,946875 0,053125   |
| S153545 | 15    | 39,5      | 7,5        | 35,25 | 56,04     | 43,96     | 0,8790323 0,1209677 |
| S153546 | 18,5  | 69,25     | 7,75       | 4,5   | 87,75     | 12,25     | 0,9188482 0,0811518 |
| S153547 | 27,75 | 40        | 4,25       | 28    | 67,75     | 32,25     | 0,9409722 0,0590278 |
| S153548 | 27,25 | 31,75     | 8,75       | 26,5  | 62,60     | 37,40     | 0,8708487 0,1291513 |
| S153549 | 0     | 0         | 0          | 0     | 0,00      | 0,00      | 0 0                 |
| S153550 | 0     | 0         | 0          | 0     | 0,00      | 0,00      | 0 0                 |
| S153551 | 0     | 0         | 0          | 0     | 0,00      | 0,00      | 0 0                 |
| S153552 | 0     | 0         | 0          | 0     | 0,00      | 0,00      | 0 0                 |
| S153553 | 31,5  | 60,75     | 4,75       | 3     | 92,25     | 7,75      | 0,9510309 0,0489691 |
| S153554 | 28,25 | 64        | 5,25       | 2,5   | 92,25     | 7,75      | 0,9461538 0,0538462 |
| S153555 | 28,75 | 64,25     | 5,5        | 1,5   | 93,00     | 7,00      | 0,9441624 0,0558376 |
| S153556 | 0     | 0         | 0          | 0     | 0,00      | 0,00      | 0 0                 |
| S153557 | 0     | 0         | 0          | 0     | 0,00      | 0,00      | 0 0                 |
| S153558 | 0     | 0         | 0          | 0     | 0,00      | 0,00      | 0 0                 |
| S153559 | 16,75 | 80,25     | 3          | 0     | 97,00     | 3,00      | 0,97 0,03           |
| S153560 | 0     | 0         | 0          | 0     | 0,00      | 0,00      | 0 0                 |
| S153561 | 0     | 0         | 0          | 0     | 0,00      | 0,00      | 0 0                 |
| S153562 | 15,75 | 81        | 2,75       | 0,5   | 96,75     | 3,25      | 0,9723618 0,0276382 |
| S153563 | 0     | 0         | 0          | 0     | 0,00      | 0,00      | 0 0                 |
| S153564 | 0     | 0         | 0          | 0     | 0,00      | 0,00      | 0 0                 |
| S153565 | 41    | 41        | 18         | 0     | 82,00     | 18,00     | 0,82 0,18           |
| S153566 | 0     | 0         | 0          | 0     | 0,00      | 0,00      | 0 0                 |
| S153567 | 36,75 | 45        | 18,25      | 0     | 81,75     | 18,25     | 0,8175 0,1825       |
| S153568 | 0     | 0         | 0          | 0     | 0,00      | 0,00      | 0 0                 |
| S153569 | 0     | 0         | 0          | 0     | 0,00      | 0,00      | 0 0                 |
| S153570 | 35,75 | 38,25     | 3,75       | 0,5   | 94,57     | 5,43      | 0,9517685 0,0482315 |
| S153571 | 30,75 | 31,25     | 4,75       | 1,25  | 91,18     | 8,82      | 0,928839 0,071161   |
| S153572 | 18,75 | 44,5      | 2,75       | 0,5   | 95,11     | 4,89      | 0,9583333 0,0416667 |
| S153573 | 13,25 | 15,75     | 3,5        | 0,5   | 87,88     | 12,12     | 0,8923077 0,1076923 |
| S153579 | 39    | 45,25     | 13,5       | 2,25  | 84,25     | 15,75     | 0,8618926 0,1381074 |
| S153581 | 12,25 | 17,75     | 18         | 0,5   | 61,86     | 38,14     | 0,625 0,375         |
| S153582 | 19,75 | 38        | 41,5       | 0,75  | 57,75     | 42,25     | 0,581864 0,418136   |
| S153583 | 0     | 0         | 0          | 0     | 0,00      | 0,00      | 0 0                 |
| S153585 | 0     | 0         | 0          | 0     | 0,00      | 0,00      | 0 0                 |
| S153586 | 0     | 0         | 0          | 0     | 0,00      | 0,00      | 0 0                 |
| S153587 | 0     | 0         | 0          | 0     | 0,00      | 0,00      | 0 0                 |
| S153588 | 0     | 0         | 0          | 0     | 0,00      | 0,00      | 0 0                 |
| S153589 | 0     | 0         | 0          | 0     | 0,00      | 0,00      | 0 0                 |
| S153590 | 48,75 | 30,5      | 18,25      | 0,5   | 80,87     | 19,13     | 0,8128205 0,1871795 |
| S153591 | 10,25 | 8,25      | 6,25       | 0     | 74,75     | 25,25     | 0,7474747 0,2525253 |
| S153592 | 46,5  | 43        | 9,5        | 1     | 89,50     | 10,50     | 0,9040404 0,0959596 |
| S153593 | 0     | 0         | 0          | 0     | 0,00      | 0,00      | 0 0                 |

PZ1

PZ 2

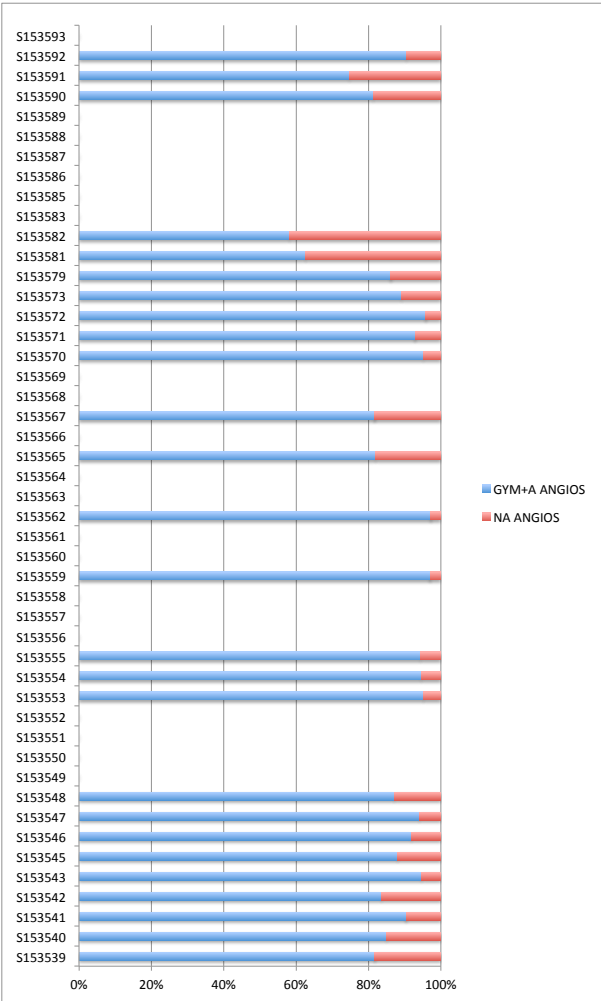

Supplementary Material 6 (3)

Salihpaşalar section (this study)

| NRM no. | GYM%  | A ANGIOS% | NA ANGIOS% | FERN% | GYM+A AN | FERN+NA | GYM+A AN  | NA ANGIOS |
|---------|-------|-----------|------------|-------|----------|---------|-----------|-----------|
| S153622 | 39,25 | 32,75     | 10,5       | 12    | 76,19    | 23,81   | 0,8727273 | 0,1272727 |
| S153623 | 25,25 | 43        | 18         | 7,75  | 72,61    | 27,39   | 0,7913043 | 0,2086957 |
| S153624 | 0     | 0         | 0          | 0     | 0,00     | 0,00    | 0         | 0         |
| S153625 | 0     | 0         | 0          | 0     | 0,00     | 0,00    | 0         | 0         |
| S153626 | 14,5  | 62,25     | 8,5        | 14    | 77,33    | 22,67   | 0,9002933 | 0,0997067 |
| S153627 | 35,25 | 38,25     | 8,75       | 11    | 78,82    | 21,18   | 0,893617  | 0,106383  |
| S153628 | 0     | 0         | 0          | 0     | 0,00     | 0,00    | 0         | 0         |
| S153629 | 22,5  | 45,75     | 4,75       | 1     | 92,23    | 7,77    | 0,9349315 | 0,0650685 |
| S153630 | 0     | 0         | 0          | 0     | 0,00     | 0,00    | 0         | 0         |
| S153631 | 29,25 | 53        | 10,5       | 0,75  | 87,97    | 12,03   | 0,8867925 | 0,1132075 |
| S153632 | 27,25 | 64        | 8,25       | 0,5   | 91,25    | 8,75    | 0,9170854 | 0,0829146 |
| S153633 | 0     | 0         | 0          | 0     | 0,00     | 0,00    | 0         | 0         |
| S153634 | 38,5  | 48,25     | 10,5       | 1,25  | 88,07    | 11,93   | 0,8920308 | 0,1079692 |
| S153635 | 18    | 72        | 7,25       | 1,5   | 91,14    | 8,86    | 0,9254499 | 0,0745501 |
| S153636 | 28,5  | 61,25     | 5,75       | 1     | 93,01    | 6,99    | 0,9397906 | 0,0602094 |
| S153637 | 25    | 62,75     | 8,75       | 1,75  | 89,31    | 10,69   | 0,9093264 | 0,0906736 |
| S153638 | 0     | 0         | 0          | 0     | 0,00     | 0,00    | 0         | 0         |
| S153639 | 17,25 | 28,5      | 17,25      | 2     | 70,38    | 29,62   | 0,7261905 | 0,2738095 |
| S153640 | 30    | 46,25     | 9,75       | 2,75  | 85,92    | 14,08   | 0,8866279 | 0,1133721 |
| S153641 | 34    | 53        | 9          | 0,75  | 89,92    | 10,08   | 0,90625   | 0,09375   |
| S153642 | 0     | 0         | 0          | 0     | 0,00     | 0,00    | 0         | 0         |
| S153643 | 0     | 0         | 0          | 0     | 0,00     | 0,00    | 0         | 0         |
| S153644 | 0     | 0         | 0          | 0     | 0,00     | 0,00    | 0         | 0         |
| S153645 | 22,25 | 63,5      | 11,25      | 1,75  | 86,84    | 13,16   | 0,8840206 | 0,1159794 |
| S153646 | 12,5  | 68,5      | 8          | 0,75  | 90,25    | 9,75    | 0,9101124 | 0,0898876 |
| S153647 | 0     | 0         | 0          | 0     | 0,00     | 0,00    | 0         | 0         |
| S153648 | 0     | 0         | 0          | 0     | 0,00     | 0,00    | 0         | 0         |

PZ1

PZ2

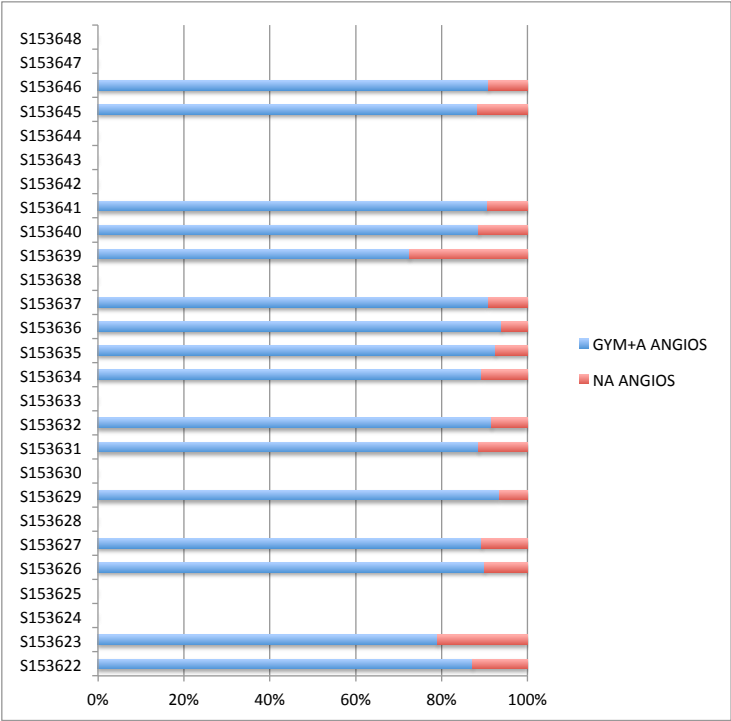

Bouchal et al. Supplementary Material S6 (3)  
Arboreal to non-arboreal pollen ratios for three sections, of the Yatağan Basin.
