# Supplementary material for: Middle Miocene climate of southwestern Anatolia from multiple botanical proxies
Source: Copernicus journal article supplement (doi:10.5194/cp-14-1427-2018), 2018-10-17
Supplement: Supplementary file [file cp-14-1427-2018-supplement-title-page.pdf › cp-14-1427-2018-supplement-title-page.pdf]

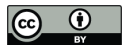

## *Supplement of*

# **Middle Miocene climate of southwestern Anatolia from multiple botanical proxies**

**Johannes Martin Bouchal et al.**

*Correspondence to:* Johannes Martin Bouchal (johannes.bouchal@nrm.se) and Thomas Denk (thomas.denk@nrm.se)

- cp-14-1427-2018-supplement-title-page.pdf
- SI1-7
  - .DS\_Store
  - Bouchal et al S\_1.pdf
  - Bouchal et al S\_2 genus level climscore.xlsx
  - Bouchal et al S\_3 CLAMP.pdf
  - Bouchal et al S\_4 percent\_climtypes.pdf
  - Bouchal et al S\_5 add\_KoÝŁppsig diagrOPZ3.pdf
  - Bouchal et al S\_6 AP\_NAP ratios.pdf
  - Bouchal et al S\_7.pdf
- \_\_MACOSX
  - .\_SI1-7
  - SI1-7
    - \* .\_DS\_Store
    - \* .\_Bouchal et al S\_1.pdf
    - \* .\_Bouchal et al S\_2 genus level climscore.xlsx
    - \* .\_Bouchal et al S\_3 CLAMP.pdf
    - \* .\_Bouchal et al S\_4 percent\_climtypes.pdf
    - \* .\_Bouchal et al S\_5 add\_KoÝŁppsig diagrOPZ3.pdf
    - \* .\_Bouchal et al S\_6 AP\_NAP ratios.pdf
    - \* .\_Bouchal et al S\_7.pdf

The copyright of individual parts of the supplement might differ from the CC BY 4.0 License.
